1        **PARP and PI3K inhibitor combination therapy eradicates c-MYC-driven**  
2        **murine prostate cancers via cGAS/STING pathway activation within tumor-**  
3        **associated macrophages**

4  
5        Priyanka Dutta Gupta<sup>1</sup>, Kiranj Chaudagar<sup>1</sup>, Sweta Sharma-Saha<sup>2\*</sup>, Kaela Bynoe<sup>1\*</sup>,  
6        Lea Maillat<sup>3</sup>, Brian Heiss<sup>1</sup>, Walter M Stadler<sup>1</sup>, Akash Patnaik<sup>1</sup>

7  
8        <sup>1</sup>Section of Hematology/Oncology, Department of Medicine, University of Chicago,  
9        Chicago, IL

10        <sup>2</sup>Translational and Clinical Research Institute, Newcastle University Centre for  
11        Cancer, Faculty of Medical Sciences, Newcastle upon Tyne, UK

12        <sup>3</sup>Pritzker School of Molecular Engineering, University of Chicago, IL

13        \*Equal Contribution of Authors

14

15        **RUNNING TITLE:** Co-targeting PARP/PI3K to activate cGAS/STING in  
16        Macrophages

17

18        **KEYWORDS:** PARP inhibitor, PI3K inhibitor, c-MYC, STING, tumor-associated  
19        macrophages, immune checkpoint blockade

20

21        **FINANCIAL SUPPORT:** Dr. Patnaik has received research support from Bristol  
22        Myers Squibb. In addition, Drs. Patnaik and Stadler have received clinical trial  
23        funding support from both Clovis Oncology and Bristol Myers Squibb.

24

25 **CORRESPONDING AUTHOR**

26 Akash Patnaik, M.D., Ph.D., M.M.Sc.

27 Knapp Center for Biomedical Discovery, 7152

28 900 East 57th Street

29 Chicago, IL 60637

30 Tel: (773) 734-3519

31

32 **CONFLICT OF INTEREST:** As noted above for Financial Support.

33

34 **WORD COUNT:** 5372

35

36 **NUMBER OF FIGURES:** 7

37

38

39

40

41

42

43 **ABSTRACT**

44 The majority of metastatic, castrate-resistant prostate cancer (mCRPC)  
45 patients are *de novo* resistant to immune checkpoint blockade (ICB), so  
46 therapeutic strategies to enhance immune-responsiveness are urgently needed.  
47 Here we performed a co-clinical trial of PARP inhibitor (PARPi) in combination with  
48 PD-1 or PDL-1 antibody in genomically unselected mCRPC patients or  
49 homologous-recombination proficient murine models, respectively, which  
50 demonstrated lack of efficacy. In contrast, PARPi in combination with PI3K inhibitor  
51 (PI3Ki), induced tumor regression via macrophage STING-dependent innate  
52 immune activation *in vivo*, and enhanced T-cell infiltration/activation in c-myc  
53 driven murine prostate cancer models, which was augmented by PD-L1 blockade.  
54 *Ex vivo* mechanistic studies revealed that PARPi-induced DNA double strand  
55 break-associated microvesicles released from tumor cells, coupled with PI3Ki-  
56 mediated c-GAS de-repression, were both required for macrophage cGAS/STING  
57 pathway activation. These data demonstrate that PARPi/PI3Ki combination  
58 triggers macrophage STING-mediated anti-cancer innate immunity, which is  
59 sufficient to induce tumor regression in ICB-refractory c-myc-driven prostate  
60 cancer.

61

62 **STATEMENT OF SIGNIFICANCE**

63 Co-targeting of PARP and PI3K signaling pathways activates c-GAS/STING  
64 pathway within tumor-associated macrophages, thereby enhancing T cell  
65 recruitment/activation and cancer clearance in c-myc-driven murine prostate

66 cancer models. PARPi/PI3Ki combination therapy could markedly increase the  
67 fraction of mCRPC patients responsive to ICB, independent of germline or tumor  
68 homologous recombination status.

69

## 70 **INTRODUCTION**

71 Prostate Cancer (PC) is the most common malignant neoplasm in men and  
72 the second most frequent cause of cancer death for males in the United States.  
73 While there have been incremental advances, mCRPC remains an incurable  
74 disease with high morbidity and mortality (1,2), so there is an urgent need to  
75 develop definitive treatments that improve survival. Over the past decade, there  
76 has been a resurgent interest in cancer immunotherapy, partly based on the  
77 profound and durable clinical responses to immune checkpoint blockade (ICB)  
78 antibodies targeting CTLA-4 and PD-1/PD-L1 (3). However, only approximately  
79 10-25% of mCRPC patients respond to these approaches (4-6).

80 *MYC* is a “master” proto-oncogene that contributes to tumorigenesis of  
81 greater than 75% of all advanced refractory human cancers, particularly prostate,  
82 colon, breast, cervical cancers, acute myeloid leukemia, lymphomas, small-cell  
83 lung cancer, and neuroblastoma (7,8). C-myc is a transcription factor encoded by  
84 the *MYC* gene on locus 8q24.21, which is frequently amplified in human cancers  
85 (8). However despite multiple pharmaceutical efforts, c-myc has remained  
86 “undruggable” (9-11). Furthermore, c-myc driven-cancers are resistant to ICB (12).  
87 Therefore, therapeutic strategies that target c-myc-driven cancers and enhance  
88 their responsiveness to ICB are urgently needed.

89           The cGAS/STING pathway is known to be physiologically activated by  
90   cytosolic double-stranded DNA (dsDNA), which typically occurs in the context of  
91   viral infections, resulting in the generation of cytosolic cyclic dinucleotides  
92   generated by the Cyclic GMP-AMP synthase (cGAS) enzyme, downstream  
93   activation of the Stimulator of Interferon Genes (STING) pathway and induction of  
94   Type I interferon (IFN) production (13-15). Recent preclinical studies have  
95   demonstrated that PARPi, which are FDA approved for BRCA1/2 mutated prostate  
96   (16,17), breast (18), ovarian (19) and pancreatic cancers (20), can activate the  
97   innate immune cGAS/STING pathway in murine homologous recombination (HR)-  
98   deficient breast and ovarian cancer models, resulting in sensitization of these  
99   tumors to ICB (21,22). Furthermore, preclinical data suggests that PARPi can elicit  
100   DNA damage in HR-proficient cancers (23), but this is generally insufficient for  
101   meaningful clinical activity (24).

102           To test the hypothesis that PARPi and resulting DNA damage can sensitize  
103   HR-proficient mCRPC to ICB, we performed a co-clinical trial testing the  
104   combination of PARPi with PD-1 or PD-L1 antibody, in both HR-proficient mCRPC  
105   patients and murine models, respectively, which demonstrated lack of efficacy. In  
106   contrast, concomitant PI3K inhibitor (PI3Ki) treatment with PARPi induced tumor  
107   regression in c-myc driven murine PC models, via tumor cell-extrinsic,  
108   macrophage STING-dependent innate immune activation, which was  
109   accompanied by enhanced T-cell infiltration/activation. Critically, the anti-tumor  
110   response elicited by PARPi/PI3Ki was augmented by PD-1/PDL1 axis blockade  
111   and abrogated in immunodeficient mice and immunocompetent mice treated with

112 systemic macrophage depleting agent (Clodronate) or STING antagonist (H-151).  
113 Mechanistically, we observed that DNA double-strand break (DSB)-associated  
114 MVs released from PARPi-treated transgenic c-myc over-expressing cancer cells,  
115 along with concomitant PI3Ki-mediated post-translational de-repression of cGAS  
116 enzymatic activity, increased cGAMP and activated the STING pathway within  
117 tumor-associated macrophages (TAMs). Taken together, these data demonstrate  
118 that PARPi/PI3Ki combination drives anti-cancer innate immunity via cGAS/STING  
119 pathway activation within TAMs, resulting in tumor regression in murine models of  
120 c-myc driven PC. Based on these observations, clinical trials testing PARPi/PI3K  
121 inhibitors with ICB are warranted in immunotherapy-refractory HR-proficient  
122 advanced PC.

123

## 124 **RESULTS**

125 **The sparse immune infiltrates in human mCRPC and murine myc-driven PC**  
126 **models are dominated by myeloid suppressive cells, particularly tumor-**  
127 **associated macrophages (TAMs).**

128 As a first step towards deconvoluting the complex ecosystem of the  
129 metastatic tumor immune microenvironment in mCRPC, we performed flow  
130 cytometric analysis of 4 tumors isolated from human mCRPC lymph node biopsy  
131 samples. Notably, immune profiling revealed an “immune desert” with a paucity of  
132 CD45+ cells within the TME (**Fig. 1A, Supplementary Table 1**). Furthermore, the  
133 small fraction of immune cells within the TME were predominantly composed of  
134 CD11b+ myeloid cells (approx. 80%, **Fig. 1B**), with F4/80+ TAMs comprising the

135 highest frequency of CD45+ cells (**Fig. 1C**). Approximately 80% of the F4/80+  
136 TAMs within the mCRPC samples were HLA-DR<sup>-</sup>/MHC II<sup>-</sup> (**Fig. 1D**), indicating that  
137 these cells are unactivated/immunosuppressive M2-like macrophages. We  
138 additionally performed immune profiling of tumors derived from two transgenic c-  
139 myc-driven prostate cancer lines, Myc-CAP (25) and B6-Myc (26), generated in  
140 FVB/NJ and C57Bl/6J genetic backgrounds, respectively. We observed a similar  
141 paucity of CD45+ immune cells within the TME, which was approx. 10-fold lower  
142 ( $p < 0.001$ ) in Myc-CAP (**Fig. 1E**), relative to the B6-Myc tumors (**Fig. 1I**). However,  
143 similar to mCRPC samples, both Myc-CAP and B6-Myc tumors showed a relative  
144 predominance (approx. 80% of CD45+ immune cells) of CD11b+ myeloid cells  
145 (**Fig. 1B, 1F, 1J**) within the TME. Within the CD11b+ myeloid population, F4/80+  
146 TAMs comprise the predominant immune subset (**Fig. 1G, 1K**), and 65-70% of  
147 these cells were unactivated/immunosuppressive (M2) HLA-DR<sup>-</sup>/MHC II<sup>-</sup>  
148 macrophages (**Fig. 1H, 1L**), similar to what was observed in the mCRPC patient  
149 samples (**Fig. 1D**). Taken together, these data demonstrate similar immune  
150 contexture in human mCRPC and murine c-myc-driven cancers, which is  
151 dominated by myeloid suppressive cells, particularly TAMs.

152

153 **Expression of STING and an activated myeloid gene expression within**  
154 **primary PC samples positively correlate with biochemical recurrence-free**  
155 **survival.**

156 We next assessed cGAS and STING expression in primary human PC  
157 samples within the TCGA, and discovered reduced expression relative to normal

158 tissue counterparts (**Fig. 2A**). Furthermore, transcriptomic data analysis of primary  
159 PC samples within the TCGA, revealed that high risk (Gleason  $\geq 8$ ) patients with  
160 higher biochemical recurrence (**Fig. 2B**), had decreased gene expression of  
161 STING (**Fig. 2C**), myeloid activation markers HLA-DR and CD86, (**Fig. 2D-E**), and  
162 T cell chemotactic factors CXCL10 and CCL5 (**Fig. 2F-G**), relative to low-risk  
163 (Gleason 6/7) patients. These data identify a positive correlation between STING  
164 expression, myeloid activation states, T cell chemotactic factor expression, and  
165 clinical outcome.

166 Next we assessed cGAS and STING protein expression in Myc-CAP and  
167 B6-Myc cells, and observed low and high cGAS/STING expression in Myc-CAP  
168 (STING<sup>lo</sup>) and B6-Myc (STING<sup>hi</sup>) cells, respectively (**Supplementary Fig. 1A**),  
169 which mimic the STING gene expression patterns observed in low and high-risk  
170 PC subgroups groups within the TCGA (Fig. 2). Consistent with the relative  
171 expression data of STING pathway components in B6-Myc (STING<sup>hi</sup>) cancer cells,  
172 we observed that deliberate STING activation with DMXAA (mouse STING  
173 agonist) activated the cGAS/STING signaling pathway components phospho-  
174 TANK-binding kinase 1 (p-TBK1) and phospho-interferon regulatory factor-3 (p-  
175 IRF3) in B6-Myc (STING<sup>hi</sup>) cells (**Supplementary Fig. 1A**), not observed in Myc-  
176 CAP (STING<sup>lo</sup>) cells. DMXAA treatment of bone marrow derived macrophages  
177 (BMDMs) also activated the c-GAS/STING signaling pathway (**Supplementary**  
178 **Fig. 1B**). Furthermore, ELISA analysis revealed that DMXAA treatment of B6-Myc  
179 (STING<sup>hi</sup>) cancer cells and BMDMs elicited a 48.1-fold and 46.4-fold induction in  
180 IFN- $\beta$  levels, not observed in Myc-CAP (STING<sup>lo</sup>) cancer cells (**Supplementary**



181 **Fig. 1C, 1D).** Interestingly, *ex vivo* treatment of single cell suspensions derived  
182 from Myc-CAP (STING<sup>lo</sup>) tumors with DMXAA demonstrated a 11.4-fold increase  
183 in IFN- $\beta$  levels within the TME, but a lack of response specifically within the CD45-  
184 negative tumor cell fraction (**Supplementary Fig 1E**). Collectively, these data  
185 demonstrate that STING pathway can be activated in a tumor cell *extrinsic* manner  
186 within Myc-CAP (STING<sup>lo</sup>) tumors. On the other hand, B6-Myc (STING<sup>hi</sup>) tumors  
187 can turn on the STING pathway in both tumor cell intrinsic and extrinsic  
188 compartments.

189

190 **Concomitant PI3Ki sensitizes B6-Myc (STING<sup>hi</sup>) murine PC to PARPi/aPD-L1**  
191 **combination therapy, via STING-dependent, TAM-driven immune**  
192 **mechanism.**

193 Recent preclinical data has demonstrated that PARP inhibitor (PARPi)-  
194 induced DNA damage can reprogram the tumor immune microenvironment via  
195 tumor cell intrinsic cGAS/STING activation, thereby enhancing T cell infiltration and  
196 efficacy of ICB in homologous recombination deficient (HRD) breast (21) and  
197 ovarian (22) cancer models. Given preclinical data suggesting that PARPi can  
198 induce DNA damage in HR-proficient cancers (23), we hypothesized that PARPi-  
199 induced DNA damage can enhance ICB efficacy, independent of HR status, in  
200 mCRPC patients enrolled in an investigator-initiated co-clinical trial at the  
201 University of Chicago (NCT03572478, IRB18-0154). To test this hypothesis,  
202 mCRPC patients that had progressed on at least one-line of AR-targeted therapy  
203 in the castrate-resistant setting, were treated with PARPi rucaparib (Clovis

204 Oncology) in combination with nivolumab (Bristol Myers Squibb) until disease  
205 progression and/or unacceptable toxicity. A Waterfall plot for mCRPC patients on  
206 study for at least 90 days, demonstrated that only 1 of 7 evaluable patients  
207 responded to the combination therapy (**Fig. 3A**). The single responder patient  
208 harbored a BRCA2 mutation that was predicted to respond to PARPi monotherapy,  
209 while the remaining patients had an HRD-proficient tumor mutational status. The  
210 combination of rucaparib and nivolumab had a PSA response rate of 9% (1/11  
211 patients) and an objective response rate, per RECIST/PCWG3 criteria, of 0% (0/11  
212 patients). Median progression-free survival for mCRPC patients on trial was 2.96  
213 months (95% Confidence Interval, 2.03 months-not assessable). Taken together,  
214 these data demonstrate that the majority of patients did not exhibit clinically  
215 meaningful responses to rucaparib/nivolumab combination therapy. Consistent  
216 with our clinical trial data, we observed *de novo* resistance of B6-Myc (STING<sup>hi</sup>)  
217 syngeneic tumors to rucaparib or rucaparib/PD-L1 antibody combination (**Fig. 3B**).

218 To address the mechanistic basis for why PARPi was insufficient to sensitize  
219 B6-Myc (STING<sup>hi</sup>) tumors, we treated B6-Myc *in vitro* with rucaparib at 500 nM  
220 concentration that completely inhibits PARylation, and evaluated its impact on DNA  
221 damage, as assessed by quantification of p- $\gamma$ H2AX foci (marker of dsDNA breaks)  
222 using confocal microscopy. Interestingly, B6-Myc cells did not show a statistically  
223 significant increase in DNA double-strand breaks (DSBs) following single-agent  
224 rucaparib treatment (**Supplementary Fig. 2A**). Several studies have demonstrated  
225 that combination of PARP inhibitors (PARPi) and pan-PI3K (PI3Ki) inhibitors  
226 induce additive DNA damage and tumor regression in prostate and endometrial

227 cancers (27,28). Consistent with these prior observations, we observed a  
228 statistically significant additive increase in DNA DSBs following concomitant  
229 treatment with rucaparib and buparlisib (pan-PI3K inhibitor), but not with  
230 corresponding single-agent treatments in B6-Myc (STING<sup>hi</sup>) cells *in vitro*  
231 **(Supplementary Fig. 2A)**. Using concentrations for rucaparib and buparlisib of 500  
232 nM and 1  $\mu$ M, respectively, that achieved complete target inhibition *in vitro*  
233 **(Supplementary Fig. 2B)**, drug combination studies revealed that there was no  
234 change in viability of B6-Myc cells **(Supplementary Fig. 2C)**. Next we tested the  
235 impact of rucaparib and buparlisib combination, with or without PD-L1 antibody, on  
236 the ability to control tumor growth of B6-Myc (STING<sup>hi</sup>) syngeneic mice *in vivo*. At  
237 doses that pharmacodynamically inhibit PARP and PI3K enzymatic activity within the  
238 tumor *in vivo* **(Supplementary Fig. 3A)**, we observed complete tumor regression  
239 with the rucaparib/buparlisib combination relative to either single-agent, that was  
240 maintained with the addition of PD-L1 antibody. This tumor clearance and immune  
241 activation elicited by the rucaparib/buparlisib combination was phenocopied by  
242 DMXAA (mouse STING agonist) administration **(Fig. 3C-G, Supplementary Fig 6A**  
243 **and 6B)**. To address the discordance between *in vitro* cytotoxicity data and *in vivo*  
244 anti-cancer responses observed with rucaparib/buparlisib combination, we  
245 hypothesized that rucaparib/buparlisib combination is working predominantly via a  
246 tumor cell extrinsic immune mechanism. To test this possibility, we evaluated the  
247 impact of the rucaparib/buparlisib combination therapy in immunodeficient athymic  
248 nude mice implanted with B6-Myc (STING<sup>hi</sup>) allograft tumors. Strikingly, the anti-  
249 cancer mechanism of rucaparib/buparlisib was abolished in immunodeficient athymic

250 nude mice (**Supplementary Fig. 4**), thus demonstrating that this combination drives  
251 tumor regression via a cancer cell non-autonomous immune mechanism.

252 Immune TME profiling studies revealed that rucaparib/buparlisib combination  
253 in syngeneic B6-Myc (STING<sup>hi</sup>) demonstrated an increase in macrophage infiltration  
254 (**Fig. 3D**) and activation (**Fig. 3E**), but not dendritic cell (DC) activation  
255 (**Supplementary Fig. 5**) and was accompanied by an increase in CD4 and CD8 T  
256 cell infiltration (**Supplementary Fig. 6A, Fig. 3F**) and activation (**Supplementary**  
257 **Fig. 6B, Fig. 3G**), respectively, relative to corresponding single-agent controls.  
258 Furthermore, the addition of PD-L1 antibody to rucaparib/buparlisib combination  
259 accentuated the anti-tumor immune responses, particularly CD4 infiltration, relative  
260 to buparlisib/rucaparib treatment (**Supplementary Fig. 6A**). Critically, the  
261 immunologic changes within the TME and tumor clearance elicited by PARPi/PI3Ki  
262 treatment were significantly attenuated by systemic macrophage depletion with  
263 clodronate (**Fig. 3C-G, Supplementary Fig 6A-B**), suggesting a macrophage-driven  
264 (DC-independent) anti-cancer innate immune mechanism for this combination.  
265 Furthermore, the anti-tumor immune response elicited by rucaparib/buparlisib  
266 combination increased MHC Class I expression within tumor cells, which was also  
267 suppressed by clodronate (**Supplementary Fig. 7**), likely related to suppression of  
268 IFN- $\gamma$ -producing T cell infiltration/activation following TAM depletion.

269 To elucidate the role of STING pathway activation and the relative  
270 contributions of tumor cell intrinsic vs. extrinsic STING on the observed tumor  
271 regression, B6-Myc (STING<sup>hi</sup>) tumor allografts were implanted into STING<sup>-/-</sup> C57Bl/6J  
272 mice. Strikingly, PARPi/PI3Ki-mediated B6-Myc tumor regression was partially

273 attenuated in STING<sup>-/-</sup> C57BL6 mice, and resulted in reduced macrophage and T  
274 cell activation, relative to their STING<sup>+/+</sup> counterparts (**Supplementary Fig. 8**).  
275 Taken together, these results demonstrate that PARPi/PI3Ki can induce tumor  
276 regression in B6-Myc (STING<sup>hi</sup>) syngeneic model via an innate immune mechanism  
277 that is driven by tumor cell extrinsic host STING within TAMs.

278

279 **PARPi/PI3Ki in combination with androgen deprivation therapy (ADT)**  
280 **causes tumor regression *in vivo* in Myc-CAP (STING<sup>lo</sup>) tumors, which is**  
281 **driven by TAM-mediated anti-cancer innate immunity.**

282 While PARPi/PI3Ki was sufficient to induce tumor clearance in B6-Myc  
283 (STING<sup>hi</sup>) syngeneic mice, Myc-CAP (STING<sup>lo</sup>) syngeneic mice are *de novo* resistant  
284 to this combination (**Supplementary Fig. 9**). This could be related to the growth of  
285 these tumors in the FVB/NJ genetic background, which is known to have low  
286 immunogenicity (29-31). Prior studies have demonstrated that early stages of  
287 castration, which is standard-of-care for advanced prostate cancer (2), induce T-  
288 effector and T-regulatory cell infiltration within prostate tumors (32,33). Consistent  
289 with prior data, we observed an approximately 5-fold increase in CD45+ infiltration  
290 in Myc-CAP (STING<sup>lo</sup>) tumors following castration, predominantly driven by an  
291 increase in the TAM subset, with a smaller contribution of CD4+ T cell subsets, but  
292 not CD8+ T cells (**Supplementary Fig. 10A-D**). In addition, there is an increased  
293 PD-L1 expression in CD45- fractions and CD45+ (particularly TAMs) within the  
294 TME following castration (**Supplementary Fig. 10E-G**). However, castration alone  
295 or in combination with rucaparib and/or PD-L1 antibody was insufficient to control

296 tumor growth in Myc-CAP (STING<sup>lo</sup>) syngeneic mice (**Fig. 4A**), which was  
297 consistent with our recent co-clinical trial data of rucaparib/nivolumab in mCRPC  
298 patients (**Fig. 3A**).

299 We next tested the hypothesis that the immunostimulatory effects of  
300 castration would lower the threshold for the PARPi/PI3Ki combination to elicit a  
301 potent anti-tumor response in Myc-CAP (STING<sup>lo</sup>) syngeneic mice. Strikingly, we  
302 observed that the combination of degarelix and rucaparib/buparlisib resulted in  
303 complete tumor regression in Myc-CAP (STING<sup>lo</sup>) syngeneic mice, not observed with  
304 single agent degarelix, rucaparib and buparlisib or their corresponding doublet  
305 therapies (**Fig. 4B**). The combination of degarelix and DMXAA phenocopied the  
306 complete tumor clearance observed with degarelix/rucaparib/buparlisib. Importantly,  
307 the anti-tumor response observed with degarelix/rucaparib/buparlisib was abolished  
308 in immunodeficient athymic nude (**Supplementary Fig 11A**) and NOD/SCID mice  
309 (**Supplementary Fig. 11B**), thus demonstrating that this regimen induces tumor  
310 control via an immune-dependent mechanism. Furthermore,  
311 degarelix/rucaparib/buparlisib triple combination led to an increase in macrophage  
312 infiltration (**Fig. 4C**), and activation (**Fig. 4D**), which was accompanied by an increase  
313 in CD4 and CD8 T cell infiltration (**Supplementary Fig. 12A, Fig. 4E**) and activation  
314 (**Supplementary Fig. 12B, Fig. 4F**), respectively, relative to corresponding singlet  
315 or doublet controls. Furthermore, this immune activation effect of  
316 degarelix/rucaparib/buparlisib was accentuated by PD-L1 antibody, specifically with  
317 respect to macrophage infiltration and CD8 infiltration/activation (**Fig 4C, 4E, 4F**).  
318 Gene expression (qRT-PCR) analysis and flow cytometric analysis of tumor extracts

319 revealed increased *il12b* expression (**Supplementary Fig. 13A**), and decreased  
320 Arginase-I expression (**Supplementary Fig. 13B**), respectively, within TAMs from  
321 degarelix/rucaparib/buparlisib-treated tumors, relative to corresponding singlet or  
322 doublet controls, thus demonstrating that the triple combination enhanced M1  
323 macrophage polarization within the TME. Furthermore, we observed that  
324 concomitant clodronate treatment abolished the tumor regression and immune-  
325 permissive reprogramming observed with degarelix/rucaparib/buparlisib treatment,  
326 with or without PD-L1 antibody (**Fig. 4B-F, Supplementary Fig. 12A-B**), similar to  
327 what was observed in B6-Myc (STING<sup>hi</sup>) model. Taken together, these data  
328 demonstrate that ADT/PARPi/PI3Ki combination induces a macrophage-mediated  
329 innate immune response in Myc-CAP (STING<sup>lo</sup>) syngeneic model, resulting in tumor  
330 clearance. Since the ADT/PARPi/PI3Ki-mediated tumor clearance was abolished in  
331 athymic nude mice, the anti-cancer responses were mediated at least in part by  
332 macrophage-mediated activation of T cell immunity.

333

#### 334 **PARPi/PI3Ki-induced STING Pathway Activation Within TAMs is Mediated via** 335 **MVs Released from Tumor cells.**

336 To determine whether PARPi/PI3Ki combination elicits DNA DSBs in Myc-  
337 CAP (STING<sup>lo</sup>) context, cells were treated *in vitro* with PARPi rucaparib, singly and  
338 in combination with buparlisib, at their respective target inhibitory concentrations  
339 (**Supplementary Fig. 14**). Interestingly, we observed that treatment of Myc-CAP  
340 cells with rucaparib caused an increase in DNA DSBs, as measured by number of p-  
341  $\gamma$ H2AX foci, which was not enhanced by the addition of PI3Ki (**Supplementary Fig.**

342 **14A).** In addition, there was no change in the viability of Myc-CAP cells treated at  
343 complete target inhibition concentrations of 500 nM and 1  $\mu$ M for rucaparib and  
344 buparlisib (**Supplementary Fig. 14B**) respectively, singly and in combination  
345 (**Supplementary Fig. 14C**). Given the requirement of dual PARP and PI3K inhibition  
346 for tumor regression *in vivo*, these *in vitro* data suggest that concomitant PI3Ki  
347 treatment activates non-tumor cell autonomous, TAM-mediated innate immunity via  
348 DNA-damage independent mechanism in Myc-CAP (STING<sup>lo</sup>) tumors.

349 To elucidate the mechanism by which PARPi/PI3Ki induces STING pathway  
350 activation within TAMs, we tested the hypothesis that rucaparib/buparlisib-induced  
351 DNA DSBs within tumor cells cross-talks via MVs that activate cGAS/STING pathway  
352 within TAMs in the TME. We first evaluated the quantity and cargo content of MVs  
353 isolated from B6-Myc (STING<sup>hi</sup>) and Myc-CAP (STING<sup>lo</sup>) cells treated with  
354 rucaparib, singly and in combination with buparlisib. We observed that the MVs  
355 ranged from 50-100 nm in size, based on Nanoparticle Tracking Analysis (NTA)  
356 measurements. Furthermore, the quantity of DNA DSBs associated with MVs, was  
357 directly proportional to intracellular DNA damage content, as assessed by  
358 Nanodrop and p- $\gamma$ H2AX foci quantification respectively, for both B6-Myc (STING<sup>hi</sup>)  
359 and Myc-CAP (STING<sup>lo</sup>) cells treated with rucaparib and buparlisib, singly and in  
360 combination (**Supplementary Fig. 2A, 2D 14A, 14D**).

361 Next we conducted *ex vivo* assays using single-cell suspensions of Myc-  
362 CAP (STING<sup>lo</sup>) tumors treated with exogenous rucaparib, singly and in  
363 combination with buparlisib. Interestingly, we observed an increase in IFN $\beta$   
364 production within the supernatants of tumor allograft single cell suspensions



365 following *ex vivo* rucaparib/buparlisib combination treatment, not observed with  
366 either single agent. Furthermore, we tested the impact of these drug(s) in the  
367 presence or absence of GW4869, an inhibitor of MV biogenesis and release.  
368 Concomitant *ex vivo* GW4869 treatment of tumor cell suspensions abolished IFN $\beta$   
369 production following rucaparib/buparlisib treatment (**Fig. 5A**), thus demonstrating  
370 that cGAS/STING pathway activation within the TME occurs via MV-associated  
371 DNA DSBs released from tumor cells.

372 If DNA DSB fragments are localized to the MV surface resulting in activation  
373 of cGAS/STING pathway activation within TAMs, then co-culture of bone marrow  
374 derived macrophages (BMDMs) with DNase I treated supernatants from  
375 rucaparib/buparlisib-treated cancer cells would be predicted to result in abrogation  
376 of Type I IFN response relative to untreated MVs. On the other hand, if DNA DSB  
377 fragments are enclosed within MVs, then DNase I treatment would have no effect  
378 on induction of Type I IFN response within BMDMs. We observed a striking  
379 decrease of IFN $\beta$  release from BMDMs that were co-cultured with  
380 rucaparib/buparlisib-treated Myc-CAP supernatants that were treated with DNase  
381 I, relative to the corresponding supernatants that were not treated with DNase I  
382 (**Fig 5B**), thus demonstrating that MV surface-associated (and not internalized)  
383 DNA DSB fragments are responsible for the Type I IFN response elicited within  
384 BMDMs.

385 Recent studies have demonstrated that direct transfer of cGAMP through  
386 tight junctions can activate the cGAS/STING pathway within the TME (34). To test  
387 the hypothesis that DNA DSBs, and not cGAMP, is responsible for cGAS/STING

388 pathway activation within TAMs, we co-cultured BMDMs with recombinant cGAMP  
389 that was pre-treated with DNase I. Importantly, DNase I pre-treatment did not  
390 abrogate the Type I IFN production within BMDMs in response to cGAMP (**Fig.**  
391 **5C**), demonstrating that it is the MV surface-associated DNA DSBs, not direct  
392 cGAMP transfer within the TME, that is responsible for cGAS/STING activation  
393 within TAMs.

394 To confirm that cGAS/STING pathway activation within TAMs is responsible  
395 for the Type I IFN response within the TME, supernatants from B6-Myc (STING<sup>hi</sup>)  
396 and Myc-CAP (STING<sup>lo</sup>) cancer cells treated with rucaparib and buparlisib, singly  
397 or in combination, were co-cultured with STING-proficient and STING-deficient  
398 BMDMs (**Fig. 5D-G**). We observed that the rucaparib/buparlisib-induced IFN $\beta$   
399 production observed when conditioned supernatants from B6-Myc (STING<sup>hi</sup>) and  
400 Myc-CAP (STING<sup>lo</sup>) cells were co-cultured with STING proficient BMDMs (**Fig. 5D,**  
401 **5F**), was abrogated under similar conditions with STING<sup>-/-</sup> BMDMs (**Fig. 5E, 5G**).  
402 To determine whether the DNA DSB-associated MV release from tumor cells and  
403 activation of STING within TAMs is relevant *in vivo*, Myc-CAP (STING<sup>lo</sup>) tumor-  
404 bearing mice were treated with the degarelix/rucaparib/buparlisib combination in  
405 the presence or absence of STING antagonist H-151 or MV biogenesis and  
406 release inhibitor GW4869. Critically, we observed an abrogation of anti-tumor  
407 response elicited by degarelix/rucaparib/buparlisib combination in Myc-CAP  
408 (STING<sup>lo</sup>) tumor-bearing mice that were concomitantly treated with H-151 or  
409 GW4869 (**Fig. 5H**). Collectively, these *ex vivo* and *in vivo* studies revealed that  
410 PARPi/PI3K treatment activates tumor-cell extrinsic cGAS/STING pathway within

411 TAMs via MV surface-associated dsDNA cargo released from Myc-CAP (STING<sup>lo</sup>)  
412 tumor cells.

413

414 **Optimal STING pathway activation within TAMs requires both MV surface-**  
415 **associated DNA DSBs and PI3Ki-mediated de-repression of cGAS activity.**

416 Recent work has shown that AKT can phosphorylate cGAS at Ser-291 and  
417 Ser-305, leading to post-translational suppression of its enzymatic activity (35).  
418 Furthermore, we observed that concomitant PI3Ki did not induce additive DNA  
419 damage with PARPi in Myc-CAP (STING<sup>lo</sup>) cells, suggesting that the addition of  
420 PI3Ki elicits a non-tumor cell autonomous DNA-damage independent mechanism  
421 for cGAS/STING pathway within TAMs. We hypothesized that the requirement for  
422 concomitant PI3Ki treatment to activate DNA-damage induced STING pathway  
423 activation within TAMs, stems from its ability to de-repress cGAS enzymatic  
424 activity, resulting in increased production of STING ligand 2'3'-cGAMP (cyclic  
425 guanosine monophosphate–adenosine monophosphate). To specifically test this  
426 hypothesis, we treated Myc-CAP (STING<sup>lo</sup>) cells with rucaparib *in vitro* for 36  
427 hours, followed by isolation of MVs from supernatant (R-MVs). Next, we co-  
428 cultured BMDMs with R-MVs in the presence or absence of buparlisib (at target  
429 inhibitory concentration of 1  $\mu$ M; **Supplementary Fig. 15**) for 36 hours and  
430 measured levels of intra-cellular cGAMP within macrophages by ELISA.  
431 Interestingly, we observed a significant induction of cGAMP only with the  
432 combination of buparlisib and MVs derived from rucaparib-treated Myc-CAP  
433 (STING<sup>lo</sup>) cells, not corresponding single-agent controls (**Fig. 6B**). Critically, the

434 combination of buparlisib and R-MVs resulted in downstream activation of STING  
435 signaling pathway components (**Fig. 6C**) and a significant increase in IFN- $\alpha$  (**Fig.**  
436 **6D**) and IFN- $\beta$  (**Fig. 6E**), similar to what was achieved with direct treatment of  
437 BMDMs with STING agonist DMXAA (**Fig. 6D-E**). Taken together, these data  
438 demonstrate that optimal STING activation within macrophages requires both  
439 PARPi-mediated MV surface-associated DNA DSBs and PI3Ki-induced de-  
440 repression of cGAS enzymatic activity (**Fig. 6F**).

441 To determine whether PARPi/PI3Ki-induced cGAS/STING pathway  
442 activation within macrophages results in their polarization from pro-tumorigenic M2  
443 to anti-tumorigenic M1 phenotype, we co-cultured BMDMs with buparlisib, singly  
444 or in combination with purified MVs derived from supernatants of Myc-CAP  
445 (STING<sup>lo</sup>) tumor cells that were treated with rucaparib (R-MVs). Flow cytometry  
446 analysis revealed an increase in MHC Class II and CD86 expression within  
447 macrophages, indicating enhanced activation and antigen presenting capacity,  
448 respectively, following treatment with both buparlisib and R-MVs, relative to single  
449 agent buparlisib or R-MVs controls. Treatment of BMDMs with DMXAA achieved  
450 similar levels of macrophage activation and antigen presentation, relative to  
451 buparlisib/R-MVs combination (**Fig. 7A-B**). Furthermore, we observed a significant  
452 increase in TNF- $\alpha$ , and T cell chemoattractant chemokines CXCL10 and CCL5  
453 release (**Fig. 7C-E**), and reversal of CSF-1R and PD-L1 inhibitory marker  
454 expression within BMDMs co-cultured with both buparlisib and R-MVs, relative to  
455 single-agent controls (**Supplementary Fig. 16A, 16B**), thus demonstrating M2-to-  
456 M1 polarization following R-MVs and buparlisib combination treatment.

457 We also performed analogous co-culture experiments of BMDMs with  
458 supernatants derived from rucaparib-treated Myc-CAP (STING<sup>lo</sup>) cells, in the  
459 presence or absence of buparlisib. Strikingly, flow cytometry analysis revealed  
460 increased MHC Class II and iNOS expression, and decreased Arginase I  
461 expression only with the rucaparib/buparlisib combination, not corresponding  
462 single-agent controls (**Supplementary Fig. 17A-C**). Furthermore, cytokine  
463 profiling of supernatants from *ex vivo* experiments revealed an increase in CXCL10  
464 and CCL5 released from BMDMs that were treated with supernatants derived from  
465 rucaparib/buparlisib treated Myc-CAP (STING<sup>lo</sup>) cells, not corresponding single  
466 agent controls (**Fig. 17D-E**). Taken together, these results demonstrate that  
467 PARPi-induced DNA DSBs and PI3Ki-induced cGAS de-repression within TAMs  
468 is required for optimal cGAS/STING activation and re-programming of  
469 macrophages from M2 suppressive to M1 activated, anti-tumor phenotype within  
470 the TME. A mechanistic model summarizing the findings in this paper is depicted  
471 in **Fig. 7F**.

472

## 473 **DISCUSSION**

474 Androgen receptor (AR)-directed therapies have had incremental benefit,  
475 but are generally not curative for the treatment of metastatic PC. There has been  
476 renewed interest in PC immunotherapy, partly based on the profound and durable  
477 clinical responses to ICB antibodies targeting CTLA-4 and PD-1/PD-L1 in other  
478 cancers (3,36). While, *de novo* androgen deprivation therapy (ADT) can induce  
479 immune cell infiltration within non-inflamed tumor microenvironment of PC only 10-

480 25% of mCRPC patients, respond to ICB (4-6). Here we show a paucity of immune  
481 cell infiltrate within the TME in mCRPC patients, which is one mechanism of  
482 resistance to ICB. Furthermore, we demonstrate that the majority of immune cells  
483 within the TME of mCRPC patients are comprised of TAMs (Fig. 1). On the basis  
484 of these findings, we hypothesized that activation of innate immunity within TAMs  
485 will enhance immune-responsiveness in PC. Critically, we demonstrate that  
486 targeting both fundamental DNA repair and oncogenic signaling pathways could  
487 markedly increase responsiveness to ICB via activation of the cGAS/STING  
488 pathway within TAMs.

489 While PARPi have been FDA approved in BRCA1/2-mutated breast cancer  
490 (18), ovarian cancer (19), mCRPC (16,17) and pancreatic cancer (20), it has  
491 limited efficacy in non-BRCA HR-deficient mCRPC (37), as well as HR-proficient-  
492 cancers (24). Here we demonstrate that PARPi, either singly and/or in combination  
493 with PI3Ki, can induce DNA damage in HR-proficient c-myc driven murine PC  
494 models (**Supplementary Fig. 2, 14**). This is likely related to enhanced dependency  
495 of c-myc induced replicative stress on PARP-1 mediated DNA repair (38), with  
496 resultant downregulation of the CDK18/ATR axis (39). Consistent with clinical  
497 observations, PARPi-induced DNA damage is insufficient to induce apoptosis of  
498 HR-proficient c-myc-driven cancer cells *in vitro* (**Supplementary Fig. 2, 14**).

499 The cGAS/STING pathway is physiologically activated by cytosolic double-  
500 stranded DNA (dsDNA), which typically occurs in the context of viral infections.  
501 Cyclic GMP-AMP synthase (cGAS) is a primary cytosolic dsDNA sensor that  
502 generates cyclic dinucleotides (cGAMP), which acts as a second messenger to

503 activate STING, which in turn induces the recruitment of TBK1 and IRF-3 to form  
504 a complex with STING (40). The activation of IRF-3 and/or NF- $\kappa$ B signaling  
505 pathways induce the expression of Type I IFNs and pro-inflammatory cytokines  
506 (41,42). Recent murine studies have demonstrated that PARPi can activate tumor  
507 cell-intrinsic cGAS/STING pathway in murine HR-deficient breast and ovarian  
508 cancers, resulting in anti-tumor responses that can be accentuated with PD-1  
509 blockade (21,22). This has led to several clinical trials evaluating radiotherapy or  
510 PARP inhibitors with ICB in different solid tumor malignancies.

511 Our clinical trial data and preclinical studies described here demonstrate  
512 that PARPi is insufficient to drive tumor cell-extrinsic cGAS/STING pathway  
513 activation and does not enhance ICB responsiveness in a co-clinical trial testing  
514 PARPi/ICB combination in HR-proficient mCRPC patients and c-myc-driven  
515 murine models of prostate cancer (**Fig. 3-4**). Critically, concomitant PARPi/PI3Ki  
516 treatment activates tumor cell-extrinsic cGAS/STING pathway activation within M2  
517 TAMs, resulting in their polarization into an anti-cancer M1 phenotype, and T cell  
518 infiltration/activation and tumor regression in immune-refractory HR-proficient c-  
519 myc-driven models of PC (**Fig. 7F**). This PARPi/PI3Ki-mediated tumor regression  
520 *in vivo* is abrogated with systemic macrophage depletion, demonstrating that the  
521 reprogramming of TAMs is responsible for driving anti-cancer innate immunity.  
522 Furthermore, the PARPi/PI3Ki combination fails to induce apoptosis of B6-Myc  
523 (STING<sup>hi</sup>) and Myc-CAP (STING<sup>lo</sup>) cancer cells *in vitro*, and effectively control  
524 tumor growth *in vivo* in corresponding immunodeficient models. Collectively, these  
525 findings demonstrate that PARPi/PI3Ki combination exerts its anti-cancer activity

526 primarily via a non-tumor cell autonomous, innate immune, macrophage-driven  
527 mechanism. Given this unanticipated immune-based mechanism for PARPi/PI3Ki  
528 combination in c-myc driven PC, these data highlight the critical unmet need for  
529 the development of more sophisticated *ex vivo* and *in vivo* combinatorial drug  
530 screening platforms, which incorporate immunological readouts beyond apoptosis  
531 induction of cancer cell lines *in vitro*.

532 Consistent with prior studies that have shown that PARPi, in combination  
533 with PI3Ki, induces additive DNA damage and suppresses tumor growth in breast  
534 and prostate preclinical models (28,43), we observed additive DNA damage in B6-  
535 Myc (STING<sup>hi</sup>) tumors with rucaparib in combination with buparlisib. In contrast,  
536 the addition of buparlisib to Myc-CAP (STING<sup>lo</sup>) cells did not further increase DNA  
537 damage, relative to rucaparib alone, thus suggesting that concomitant PI3Ki  
538 treatment elicits anti-cancer effects via a DNA-damage independent mechanism in  
539 Myc-CAP (STING<sup>lo</sup>) tumors. A recent study has demonstrated that AKT  
540 phosphorylates the S<sup>291</sup> or S<sup>305</sup> of the carboxyl-terminal enzymatic domain of  
541 mouse or human cGAS, respectively, and that this phosphorylation robustly  
542 suppresses cGAS enzymatic activity, leading to decreased cytokine production  
543 and antiviral activity following DNA virus infection (35). Furthermore, our *ex vivo*  
544 studies revealed that presence of DNA DSBs within the TME is insufficient to drive  
545 cGAS/STING pathway activation within TAMs. We therefore tested the hypothesis  
546 that the PI3K/AKT pathway suppresses c-GAS enzymatic within TAMs, thereby  
547 preventing STING pathway activation in response to PARPi-induced DNA DSBs.  
548 Consistent with this hypothesis, we observed that PI3Ki de-represses cGAS



549 enzymatic activity, resulting in increased cGAMP production, STING activation and  
550 Type I IFN production, which is required for DNA DSB induced cGAS/STING  
551 activation within TAMs.

552 In this study, we have made the exciting observation that PARPi-induced  
553 DNA DSBs are transported within the TME as cargo associated with the surface  
554 of MVs, which can secondarily activate cGAS/STING pathway in TAMs.  
555 Furthermore, this DNA DSB-induced cGAS activation within TAMs is abolished by  
556 concomitant DNase I treatment, suggesting that the DNA DSB is associated on  
557 the surface of the MVs, and not internally within the membrane lipid bilayer. These  
558 findings are supported by a recent study has shown that dsDNA can be associated  
559 with the surface of exosomes (44). Given that exosomes/MVs can have  
560 immunosuppressive and pro-metastatic properties (45,46), our findings suggest  
561 the possibility that PARPi can render MVs more immunogenic, similar to prior  
562 observations made with MVs produced after radiotherapy (47). Future studies will  
563 be needed to evaluate the possibility of utilizing blood-based MVs biomarkers as  
564 pharmacodynamic readouts of PARPi-induced DNA damage within the TME.

565 Prior studies have demonstrated that early stages of castration induce T-  
566 effector and T-regulatory cell infiltration within human and prostate tumors (32,33).  
567 In this study, we interrogated two different murine models of c-myc-driven PC, B6-  
568 Myc (STING<sup>hi</sup>) and Myc-CAP (STING<sup>lo</sup>), which express high and low levels of  
569 cGAS/STING signaling pathway components (**Supplementary Fig. 1**),  
570 respectively, and mimic the heterogeneity of cGAS and STING expression  
571 observed in human PC (**Fig. 2**). In the B6-Myc (STING<sup>hi</sup>) context, the combination

572 of PARPi/PI3Ki was sufficient to drive a macrophage-mediated innate immune  
573 response and tumor clearance, whereas Myc-CAP (STING<sup>lo</sup>) bearing syngeneic  
574 mice were *de novo* resistant to this combination. Strikingly, we observed that the  
575 addition of ADT, when combined with PARPi/PI3Ki, resulted in an anti-cancer  
576 innate immune response and tumor clearance, similar to that observed in B6-Myc  
577 mice treated with the combination without castration. There are several potential  
578 explanations for these findings. First, C57BL6 is a more immunogenic strain than  
579 FVB mice (29,31), resulting in a lower threshold for immune-sensitization that is  
580 dependent on host factors. Second, the presence of higher tumor cell intrinsic  
581 STING levels in B6-Myc, relative to Myc-CAP cells, could account for the approx.  
582 10-fold higher baseline CD45+ immune cell infiltration in B6-Myc tumors *in vivo*,  
583 relative to Myc-CAP tumors. Following castration, Myc-CAP (STING<sup>lo</sup>) tumors  
584 have an approx. 5-fold increase in CD45+ immune cell infiltration (predominantly  
585 TAMs), which provides the necessary immunological milieu needed for optimal  
586 cGAS/STING activation within the TME following PARPi/PI3Ki treatment.  
587 Collectively, these data suggest that baseline cGAS and STING expression can  
588 be developed as potential biomarkers for response to PARPi/PI3K combination  
589 therapy in earlier stages of PC treatment, where castration is not standard-of-care.  
590 Given our findings that high-risk (Gleason  $\geq 8$ ) PC is enriched for tumors with low  
591 tumor cell intrinsic STING expression, the findings in this paper warrant the  
592 development of immuno-oncology clinical trials testing the combination of ADT with  
593 PARPi/PI3Ki/PD-1 blockade in *de novo* hormone-sensitive, locally advanced or  
594 metastatic PC.

595 In summary, we have demonstrated that concomitant targeting of PARP  
596 and PI3K signaling pathways can trigger non-tumor cell autonomous c-  
597 GAS/STING pathway activation within TAMs, thereby enhancing T cell  
598 recruitment/activation into the TME and tumor regression in HR-proficient c-myc-  
599 driven murine models. Based on these findings, PARPi/PI3Ki combination therapy  
600 could markedly increase the fraction of PC patients responsive to ICB,  
601 independent of HR status, and clinical trials to test this combinatorial approach are  
602 warranted.

603

## 604 **METHODS**

### 605 ***Rucaparib/nivolumab clinical trial in mCRPC patients***

606 mCRPC prostate cancer patients, independent of HR status, who had  
607 received at least one AR targeted therapy, without prior exposure to PARPi or ICB  
608 therapy, were enrolled in an investigator-initiated, IRB-approved co-clinical trial  
609 (NCT03572478) of rucaparib (PARPi) with nivolumab (PD-1 antibody), that was  
610 co-sponsored by Clovis Oncology and BMS respectively. The patients were  
611 treated until disease progression or unacceptable toxicity. All patients provided  
612 informed consent prior to clinical trial enrollment. As part of study requirements,  
613 serial PSAs were obtained on a monthly basis following study enrollment and  
614 measured using standard clinical laboratory diagnostic methods.

615

### 616 ***Multi-Parameter Flow Cytometry***

617            *Human Biopsies:* Tissues were processed into single cell suspensions via  
618 gentle mechanical dissociation in 12-well plates containing 1 ml of 10% RPMI  
619 media supplemented with 10% fetal bovine serum, 1% penicillin-streptomycin and  
620 2% L-glutamine. Cell suspensions were centrifuged at 500g for 5 minutes at 4 °C,  
621 resuspended in FACS buffer (1X PBS containing 0.5% FBS and 0.01% sodium  
622 azide) and used for staining with the following anti-human antibodies (Biolegend):  
623 CD45, CD11b, CD163, CD68, HLA-DR, CD15, CD33, CD16, PD-L1, CD3, CD4,  
624 CD8 CD19, 4-1BB, PD-1, CD11c. All flow antibodies in this study were utilized at  
625 recommended dilutions provided by the manufacturer.

626            *Murine tumors:* Murine tumors were processed identically with an additional  
627 step of filtration to remove cell debris, where single cells were passed through a  
628 70-micron mesh, prior to stain. One million cells resuspended in 1X FACS buffer  
629 were stained with titrated concentrations of the following anti-mouse antibodies:  
630 CD45, CD11b, CD11c, CD19, F480, Ly6G, Ly6C, PD-L1, and VISTA, I-A<sup>e</sup>/IA<sup>b</sup>, H-  
631 2<sup>Kb</sup>, CD3, CD4, CD8, 4-1BB, PD-1, CD206, CSF-1R. Incubation with antibodies  
632 was done at 4 °C for 30-40 minutes for both murine and human cells. Following  
633 staining, cells were washed twice with 1X FACS buffer and fixed with 300 µl of 4%  
634 paraformaldehyde (Fisher Scientific), prior to analysis on BD instrument LSR 4-15  
635 Fortessa. Data collected on flow cytometer using BDFACSDIVA software and was  
636 analyzed using Flow Jo software (Tree Star).

637

638            ***Bioinformatics analysis of myeloid gene signature using TCGA database***

639 The transcriptome data (Illumina HiSeq RNASeqV2) was downloaded for prostate  
640 tumors and normal prostate from the TCGA data portal ([http://tcga-](http://tcga-data.nci.nih.gov/tcga/tcgaHome2.jsp)  
641 [data.nci.nih.gov/tcga/tcgaHome2.jsp](http://tcga-data.nci.nih.gov/tcga/tcgaHome2.jsp)) and analyzed for differential expression of  
642 STING and c-GAS. Additionally, the Biochemical Recurrence (BCR) status and  
643 Gleason Scores were also downloaded for 488 prostate tumors. The samples were  
644 grouped into High Gleason score ( $\geq 8$ ) and Low Gleason score (6/7). The RNA-  
645 Seq data was used to analyze the differential expression of genes between high  
646 and low Gleason score samples. Statistical analysis evaluating changes in gene  
647 expression between the different groups were done using unpaired non-parametric  
648 t-test.

649

### 650 **Cancer Cell Lines**

651 Transgenic c-myc<sup>hi</sup> prostate tumor derived cell line, Myc-CAP (STING<sup>lo</sup>)  
652 (25) was obtained from ATCC and passaged in 1X DMEM (without phenol red)  
653 containing 10% fetal bovine serum, 1% penicillin-streptomycin and 2% L-  
654 glutamine. The corresponding c-myc<sup>hi</sup> line derived from a C57BL6 generated  
655 background (26) were grown for *in vitro* studies, using same culture conditions as  
656 for Myc-CAP. All cell lines were confirmed to be Mycoplasma-free, using Universal  
657 Mycoplasma Detection Kit (ATCC® 30-1012K™) testing kit. Both B6-Myc  
658 (STING<sup>hi</sup>) cell line and B6-Myc whole tumor explants used for *in vivo* studies were  
659 a kind gift from Dr. Leigh Ellis (Dana Farber Cancer Institute, Boston). For *in vitro*  
660 drug treatments, the following concentrations, were used: Rucaparib (500 nM),

661 Buparlisib (1  $\mu$ M), DMXAA (50  $\mu$ g/ml) with specific treatment durations for  
662 individual experiments indicated in the figure legends.

663

#### 664 **Western Blot Analysis**

665 RIPA and T-PER buffer (Thermo Scientific), supplemented with protease  
666 (Roche) and phosphatase inhibitor cocktail (Roche), were used for preparation of  
667 lysates from *in vitro* cell lines and whole tumor chunks, respectively. For western  
668 blotting, the following antibodies were used from Cell Signaling Technology:  
669 Polyclonal rabbit anti-mouse- phospho- $\gamma$ H2AX, phospho-AKT, total AKT, cGAS,  
670 STING, phospho-IRF3, total IRF3, phospho-TBK1, total TBK1, PTEN,  $\beta$ -actin and  
671 GAPDH. Monoclonal anti-mouse PAR antibody was obtained from Trevigen.  
672 Images of scanned blots were processed using ADOBE Photoshop.

673

#### 674 **Generation of BMDMs**

675 Bone marrow derived macrophages were differentiated as previously  
676 described (48). Briefly, bone marrow cells were isolated from male FVB/NJ,  
677 C57Bl/6J<sup>STING+/+</sup> and C57Bl/6J-Sting1<sup>gt/J</sup>(<sup>STING-/-</sup>) mice and differentiated in the  
678 presence of 10X RPMI media (supplemented with 10% fetal bovine serum, 1%  
679 penicillin-streptomycin and 2% L-glutamine) containing 30% L-conditioned media  
680 or M-CSF (50 ng/ml) for 5-7 days. stimulated directly with 50  $\mu$ g/ml of 5,6-  
681 Dimethylxanthenone-4-acetic Acid (DMXAA, mouse STING agonist) for 36 hours.  
682 Following treatment, supernatants were collected for Type I IFN ELISA (LEGEND  
683 MAX<sup>TM</sup> Mouse IFN $\beta$ 1 ELISA, Biolegend) and processed as specified in protocol.

684

685 ***Generation of syngeneic models and in vivo drug administration***

686 Wild-type (WT) C57BL/6J, C57BL/6J-Sting1<sup>gt</sup>/J<sup>(STING<sup>-/-</sup>)</sup>, FVB/NJ mice,  
687 Athymic nude (Nu/J) and NOD-SCID(NOD.CB17-Prkdc /J) were purchased from  
688 Jackson laboratories and mice were kept in an AALAC (American Association for  
689 the Accreditation of Laboratory Animal Care) certified barrier facility at the  
690 University of Chicago. Animal work was carried out according to approved  
691 Institutional Animal Care and Use Committee protocols. For Myc-CAP-based  
692 experiments, mice aged 8-10 week were engrafted with 1 million Myc-CAP cells  
693 re-suspended in 1X PBS, under anesthesia. For experiments using B6-Myc, 5 mm<sup>2</sup>  
694 tumor chunks were implanted subcutaneously in mice. Treatments were started  
695 when tumor volumes reached approximately 200-400 mm<sup>3</sup>, and mice were  
696 randomly allocated to treatment groups as indicated. For *in vivo* treatments,  
697 lyophilized drugs were reconstituted in appropriate solvents and were  
698 administered at the following doses: Degarelix (0.625 mg/kg) was administered as  
699 a single intraperitoneal (i.p.) injection. Rucaparib (Clovis Oncology) and buparlisib  
700 (the Stand up to Cancer Drug Formulary at Dana Farber Cancer Institute) were  
701 administered daily by oral gavage at 150mg/kg and 30 mg/kg, respectively,  
702 whereas anti-mouse PD-L1 (clone 10F.9G2; BioXcell) was administered i.p. at 100  
703 µg once every 2 days. DMXAA was injected intratumorally once at a dose of 500  
704 µg/kg. Exosomal Inhibitor GW4869 (Sigma Aldrich) and STING antagonist H-151  
705 (Invivogen) were dosed at 500 µg/gm of body weight i.p. daily and 750  
706 nanomoles/kg i.p. daily, respectively. For *in vivo* macrophage depletion studies,

707 Clodronate (Standard Macrophage Depletion kit, Encapsula Nanosciences) was  
708 injected i.p. on a weekly basis at recommended dose of 300  $\mu$ l of clodronate-  
709 liposomal emulsion containing 18.4 mM concentration of clodronate). All *in vivo*  
710 treatments were done for 15-28 days and tumor volume measurements were  
711 collected on a daily basis. Tumor volume was calculated using the formula:  
712  $0.5 \times \text{longest diameter} \times (\text{shortest diameter})^2$ . Euthanasia was performed for mice  
713 bearing tumor ulceration and/or tumor diameter >2 cm, as per IACUC-approved  
714 protocol.

715

### 716 ***Confocal Microscopy***

717 Tumor cells were grown at titrated seeding density in glass bottom plates  
718 and treated with indicated drug(s) at concentrations described above. Following  
719 36 hours of treatment, culture media was aspirated and the cells were washed  
720 twice with 1X PBS. Cells were then fixed with 4% paraformaldehyde at 4 °C,  
721 followed by permeabilization briefly with cold 100% ethanol for 8 mins at 4 °C.  
722 Staining for DNA DSBs was done with anti-mouse primary antibody, specific for  
723 phospho- $\gamma$ H2AX (1:500 dilution, Cell signaling) and secondary anti-rabbit IgG  
724 antibody conjugated to AF647 (1:1000-1:2000 dilution in 1X PBS, Thermo Fischer  
725 Scientific). Anti-mouse specific  $\beta$ -actin conjugated to Phycoerythrin (PE, Thermo  
726 Fischer Scientific) was used to stain the cytoskeleton. All staining procedures were  
727 done at 4 °C for 30 minutes. Cells were then washed 3 times with 1X PBS and  
728 imaged immediately. All images were collected using an Olympus Fluoview 1000



729 using a 100X oil objective. Acquired images were analyzed by Image J software,  
730 developed at NIH.

731

### 732 ***MV Isolation/DNA extraction***

733 Cells were treated for 36 hours with the indicated drug(s), and supernatants  
734 were harvested and then centrifuged at 300g for 5 minutes at 4 °C to pellet cells.  
735 This was followed by additional centrifugation steps at 2,000g for 10 min at 4 °C  
736 to eliminate dead cell debris and at 10,000g for 30 min in at 4 °C to remove larger  
737 vesicles. The supernatant was then collected and subjected to 100,000 g  
738 centrifugation in a Type 60 Ti rotor (38000 rpm) for 70 min at 4 °C. The 100,000g  
739 pellet was suspended in 1X PBS to the initial volume of supernatant (2 ml), and  
740 washed by an additional spin in the ultracentrifuge for 70 min at 4 °C. The final  
741 MV pellet was collected in 1X PBS and used for quantification. Measurements of  
742 particle size distribution (PSD) and concentration were performed with a  
743 Nanosight LM10 HS-BF instrument (Nanosight Ltd, UK), based on NTA  
744 measurements, using a 405-nm 65-mW laser and an EMCCD Andor Luca  
745 camera, and revealed MV size range of 50-100 nm.

746 Samples were diluted with particle-free PBS in a 1:100 dilution (pH = 7.4)  
747 to reach the optimal concentration for NTA. All measurements were performed  
748 under the identical camera settings (Shutter: 850, Gain: 450, Lower Threshold:  
749 910, Higher Threshold: 11180, 60 s) and processing conditions (NTA 2.3 build  
750 0033, Detection Threshold: 9 Multi, min Track Length: Auto, min Expected Size:  
751 minimum of 30 nm). Measurements were performed in multiple repeats (n=3) to

752 collect an at least 5000 events, and then equal numbers of MVs were used for  
753 downstream assays. Equal numbers of MVs were collected from each treatment  
754 group and DNA was extracted using Trizol LS as per protocol (Thermo Fischer  
755 Scientific), and then quantified using Nanodrop.

756

### 757 ***Viability Assays***

758 Single cell suspensions at a concentration of 0.5 million cells/0.5ml of 1X  
759 Annexin Buffer, were stained with Annexin V/PI (FITC Annexin V Apoptosis  
760 Detection kit, BD Biosciences) as specified in manufacturer protocol. Acquisition  
761 and analysis of the data sets were done as previously described in section on  
762 Multi-parameter flow cytometry.

763

### 764 ***Ex vivo reconstitution assay***

765 Subcutaneous tumors were isolated by gentle mechanical dissociation in  
766 the presence of 10X RPMI (supplemented with 10% fetal bovine serum, 1%  
767 penicillin-streptomycin and 2% L-glutamine). 1X ACK was used for RBC lysis.  
768 Single cell suspensions were washed twice with media, by centrifuging at 500g for  
769 5 minutes at 4 °C and quantified using 0.1% Trypsin solution. For sorting of  
770 CD45+ cells, PE selection kit (EasySep™ Mouse PE Positive Selection Kit) was  
771 used for staining and magnetic extraction of positively labeled cells, as per  
772 protocol from vendor. Single cells suspensions derived from tumor were seeded  
773 at a concentration of 0.2-0.5 million cells/ml and treated with the following drugs:  
774 DMXAA (50ug/ml), rucaparib 500 nM; buparlisib at 1000 nM, singly or in

775 combination, in the presence or absence of exosome inhibitor GW4869  
776 (7.8ng/ml), for 36 hours. All drug stocks were reconstituted in DMSO and further  
777 diluted in media used for cell lines *in vitro*. Supernatants were collected at the  
778 end of 36 hours and processed as per ELISA protocol for detection of Type I  
779 Interferon, as described above.

780

### 781 ***Ex Vivo Co-culture Studies with BMDMs***

782 For DNase I studies, Myc-CAP cells were treated with PARPi or PI3Ki,  
783 singly or in combination for 36 hours, and supernatants were treated with 50 units  
784 of DNase I in 1X reaction buffer with MgCl<sub>2</sub>, and incubated at 37 °C for 30 min. For  
785 neutralization of the DNase I reaction, 1 µL of 50 mM EDTA was added to the mix  
786 and then incubated at 65 °C for 10 min. Following this step, supernatants -/+  
787 DNase I were added to BMDMs for 30 hours, and IFNβ1 secretion was assessed,  
788 as described above. To rule out cGAMP as the mediator of STING pathway  
789 activation within BMDMs, 10 µg of cGAMP disodium salt (MedChem Express) was  
790 reconstituted in RNA/DNase free water and pre-treated with 10 units of DNase I.  
791 For BMDM STING validation studies, STING<sup>+/+</sup>/STING<sup>-/-</sup> BMDMs were co-cultured  
792 for 36 hours with supernatants from Myc-CAP and B6-Myc cancer cells, that were  
793 treated with the indicated drug(s) for 36 hours. Supernatants were collected at the  
794 end of treatment and analyzed for IFNβ1 by ELISA.

795 For MV reconstitution studies, Myc-CAP (STING<sup>lo</sup>) cells were treated with  
796 rucaparib (0.5 µM) for 36 hours, followed by isolation of MVs from supernatant (R-  
797 MVs), which were then co-cultured with BMDMs in the presence/absence of

798 buparlisib (1  $\mu$ M) for 36 hours. Cellular metabolites and proteins extracted from co-  
799 cultured BMDMs were used for cGAMP ELISA and for assessment of activation of  
800 STING pathway by western blotting. Supernatants were collected at the end of 30-  
801 36 hrs and used for detection of Type I IFN/related cytokines and chemokines by  
802 cytokine array.

803

#### 804 **cGAMP assay**

805 For the colorimetry-based detection of cGAMP production in M2  
806 macrophages, cells were treated with MVs isolated from rucaparib-treated Myc-  
807 CAP cancer cells, in the presence or absence of buparlisib. Following 30 hours of  
808 treatment, the cells were harvested and cell lysates processed using  
809 recommended buffers (cGAMP detection kit, Cayman Chemical) and then used  
810 for incubation with anti-cGAMP antibody and detection conjugate for 2 hours or  
811 overnight at 4 °C. Next, substrate was added and cGAMP was detected at the  
812 indicated wavelength, as per manufacturer's instructions

813

#### 814 **Quantitative Reverse Transcriptase-Polymerase Chain Reaction (qRT-PCR)**

##### 815 **for Cytokine/Transcription factor**

816 Snap frozen tumor chunks from *in vivo* treatment groups were used for  
817 isolation of RNA using Qiagen RNeasy Plus isolation kit (Qiagen), and then used  
818 for RT-mediated cDNA synthesis (cDNA RT kit, BioRad), following which PCR was  
819 performed with primers specific for *Il-12b* and  $\beta$ -actin, using SyBr Green Universal  
820 master mix (BioRad). Each murine sample was analyzed in triplicate on ViiA™ 7

821 Real-Time PCR System (Applied Biosystems®). Data generated was normalized  
822 to  $\beta$ -actin.

823

### 824 ***Intracellular Staining for Arginase I***

825 Single cells isolated from murine tumor/differentiated BMDMs were  
826 processed using BD Cytotfix/Cytoperm solution kit (Fischer Scientific), as per  
827 specified protocol. Anti-mouse Arginase I (R&D Systems) was used at  
828 recommended dilution for staining of permeabilized cells for 40 mins at room  
829 temperature. For flow cytometry, cells were washed twice with FACS buffer by  
830 centrifuging at 500g for 5 minutes at 4 °C and resuspended in 300  $\mu$ l of FACS  
831 buffer.

832

### 833 ***Statistical Analysis***

834 One-way ANOVA/Mann Whitney/Unpaired t-test/Paired t-test as well as  
835 Kolmogrov Smirnov test was used for used for statistical evaluation of  
836 experimental datasets. The specific statistical tests used for individual experiments  
837 are specifically indicated within the figure legends.

838

### 839 **ACKNOWLEDGEMENTS**

840 We thank Dr. Thomas Gajewski for providing helpful suggestions for this  
841 manuscript.

842 **REFERENCES**

- 843 1. Siegel RL, Miller KD, Jemal A. Cancer statistics, 2020. *CA Cancer J Clin*  
844 **2020**;70(1):7-30.
- 845 2. Thomas TS, Pachynski RK. Treatment of Advanced Prostate Cancer. *Mo*  
846 *Med* **2018**;115(2):156-61.
- 847 3. Wei SC, Duffy CR, Allison JP. Fundamental Mechanisms of Immune  
848 Checkpoint Blockade Therapy. *Cancer Discovery* **2018**;8(9):1069-86.
- 849 4. De Velasco MA, Uemura H. Prostate cancer immunotherapy: where are we  
850 and where are we going? *Curr Opin Urol* **2018**;28(1):15-24.
- 851 5. Papanicolau-Sengos A, Yang Y, Pabla S, Lenzo FL, Kato S, Kurzrock R, *et*  
852 *al.* Identification of targets for prostate cancer immunotherapy. *Prostate*  
853 **2019**;79(5):498-505.
- 854 6. Olson B, Patnaik A. Utilizing precision medicine to modulate the prostate  
855 tumor microenvironment and enhance immunotherapy. *Urol Oncol*  
856 **2019**;37(8):535-42.
- 857 7. Lancho O, Herranz D. The MYC Enhancer-ome: Long-Range  
858 Transcriptional Regulation of MYC in Cancer. *Trends Cancer*  
859 **2018**;4(12):810-22.
- 860 8. Schaub FX, Dhankani V, Berger AC, Trivedi M, Richardson AB, Shaw R, *et*  
861 *al.* Pan-cancer Alterations of the MYC Oncogene and Its Proximal Network  
862 across the Cancer Genome Atlas. *Cell systems* **2018**;6(3):282-300.e2.

- 863 9. Carabet LA, Rennie PS, Cherkasov A. Therapeutic Inhibition of Myc in  
864 Cancer. Structural Bases and Computer-Aided Drug Discovery  
865 Approaches. *Int J Mol Sci* **2018**;20(1).
- 866 10. Chen H, Liu H, Qing G. Targeting oncogenic Myc as a strategy for cancer  
867 treatment. *Signal Transduct Target Ther* **2018**;3:5.
- 868 11. Shams R, Asadzadeh Aghdai H, Behmanesh A, Sadeghi A, Zali M, Salari  
869 S, *et al.* MicroRNAs Targeting MYC Expression: Trace of Hope for  
870 Pancreatic Cancer Therapy. A Systematic Review. *Cancer management*  
871 *and research* **2020**;12:2393-404.
- 872 12. Sharma P, Hu-Lieskovan S, Wargo JA, Ribas A. Primary, Adaptive, and  
873 Acquired Resistance to Cancer Immunotherapy. *Cell* **2017**;168(4):707-23.
- 874 13. Barber GN. STING: infection, inflammation and cancer. *Nat Rev Immunol*  
875 **2015**;15(12):760-70.
- 876 14. Margolis SR, Wilson SC, Vance RE. Evolutionary Origins of cGAS-STING  
877 Signaling. *Trends Immunol* **2017**;38(10):733-43.
- 878 15. Phelan T, Little MA, Brady G. Targeting of the cGAS-STING system by DNA  
879 viruses. *Biochem Pharmacol* **2020**;174:113831.
- 880 16. de Bono J, Mateo J, Fizazi K, Saad F, Shore N, Sandhu S, *et al.* Olaparib  
881 for Metastatic Castration-Resistant Prostate Cancer. *N Engl J Med*  
882 **2020**;382(22):2091-102.
- 883 17. Mateo J, Porta N, Bianchini D, McGovern U, Elliott T, Jones R, *et al.*  
884 Olaparib in patients with metastatic castration-resistant prostate cancer with

- 885 DNA repair gene aberrations (TOPARP-B): a multicentre, open-label,  
886 randomised, phase 2 trial. *Lancet Oncol* **2020**;21(1):162-74.
- 887 18. Jerez Y, Marquez-Rodas I, Aparicio I, Alva M, Martin M, Lopez-Tarruella S.  
888 Poly (ADP-ribose) Polymerase Inhibition in Patients with Breast Cancer and  
889 BRCA 1 and 2 Mutations. *Drugs* **2020**;80(2):131-46.
- 890 19. Jorge S, Swisher EM, Norquist BM, Pennington KP, Gray HJ, Urban RR, *et*  
891 *al.* Patterns and duration of primary and recurrent treatment in ovarian  
892 cancer patients with germline BRCA mutations. *Gynecol Oncol Rep*  
893 **2019**;29:113-7.
- 894 20. Golan T, Hammel P, Reni M, Van Cutsem E, Macarulla T, Hall MJ, *et al.*  
895 Maintenance Olaparib for Germline BRCA-Mutated Metastatic Pancreatic  
896 Cancer. *N Engl J Med* **2019**;381(4):317-27.
- 897 21. Pantelidou C, Sonzogni O, De Oliveria Taveira M, Mehta AK, Kothari A,  
898 Wang D, *et al.* PARP Inhibitor Efficacy Depends on CD8(+) T-cell  
899 Recruitment via Intratumoral STING Pathway Activation in BRCA-Deficient  
900 Models of Triple-Negative Breast Cancer. *Cancer Discov* **2019**;9(6):722-37.
- 901 22. Ding L, Kim HJ, Wang Q, Kearns M, Jiang T, Ohlson CE, *et al.* PARP  
902 Inhibition Elicits STING-Dependent Antitumor Immunity in Brca1-Deficient  
903 Ovarian Cancer. *Cell Rep* **2018**;25(11):2972-80 e5.
- 904 23. Wang H, Zhang S, Song L, Qu M, Zou Z. Synergistic lethality between  
905 PARP-trapping and alantolactone-induced oxidative DNA damage in  
906 homologous recombination-proficient cancer cells. *Oncogene*  
907 **2020**;39(14):2905-20.



- 908 24. Veneris JT, Matulonis UA, Liu JF, Konstantinopoulos PA. Choosing wisely:  
909 Selecting PARP inhibitor combinations to promote anti-tumor immune  
910 responses beyond BRCA mutations. *Gynecol Oncol* **2020**;156(2):488-97.
- 911 25. Watson PA, Ellwood-Yen K, King JC, Wongvipat J, Lebeau MM, Sawyers  
912 CL. Context-dependent hormone-refractory progression revealed through  
913 characterization of a novel murine prostate cancer cell line. *Cancer Res*  
914 **2005**;65(24):11565-71.
- 915 26. Ellis L, Ku S, Li Q, Azabdaftari G, Seliski J, Olson B, *et al.* Generation of a  
916 C57BL/6 MYC-Driven Mouse Model and Cell Line of Prostate Cancer.  
917 *Prostate* **2016**;76(13):1192-202.
- 918 27. Bian X, Gao J, Luo F, Rui C, Zheng T, Wang D, *et al.* PTEN deficiency  
919 sensitizes endometrioid endometrial cancer to compound PARP-PI3K  
920 inhibition but not PARP inhibition as monotherapy. *Oncogene*  
921 **2018**;37(3):341-51.
- 922 28. Gonzalez-Billalabeitia E, Seitzer N, Song SJ, Song MS, Patnaik A, Liu XS,  
923 *et al.* Vulnerabilities of PTEN-TP53-deficient prostate cancers to compound  
924 PARP-PI3K inhibition. *Cancer Discov* **2014**;4(8):896-904.
- 925 29. Davie SA, Maglione JE, Manner CK, Young D, Cardiff RD, MacLeod CL, *et*  
926 *al.* Effects of FVB/NJ and C57Bl/6J strain backgrounds on mammary tumor  
927 phenotype in inducible nitric oxide synthase deficient mice. *Transgenic Res*  
928 **2007**;16(2):193-201.
- 929 30. Disis ML, Palucka K. Evaluation of cancer immunity in mice. *Cold Spring*  
930 *Harb Protoc* **2014**;2014(3):231-4.

- 931 31. Vibert J, Thomas-Vaslin V. Modelling T cell proliferation: Dynamics  
932 heterogeneity depending on cell differentiation, age, and genetic  
933 background. *PLoS Comput Biol* **2017**;13(3):e1005417.
- 934 32. Shen YC, Ghasemzadeh A, Kochel CM, Nirschl TR, Francica BJ, Lopez-  
935 Bujanda ZA, *et al.* Combining intratumoral Treg depletion with androgen  
936 deprivation therapy (ADT): preclinical activity in the Myc-CaP model.  
937 *Prostate Cancer Prostatic Dis* **2018**;21(1):113-25.
- 938 33. Obradovic AZ, Dallos M, Zahurak ML, Partin AW, Schaeffer EM, Ross AE,  
939 *et al.* T-Cell Infiltration and Adaptive Treg Resistance in Response to  
940 Androgen Deprivation With or Without Vaccination in Localized Prostate  
941 Cancer. *Clin Cancer Res* **2020**.
- 942 34. Ablasser A, Schmid-Burgk JL, Hemmerling I, Horvath GL, Schmidt T, Latz  
943 E, *et al.* Cell intrinsic immunity spreads to bystander cells via the  
944 intercellular transfer of cGAMP. *Nature* **2013**;503(7477):530-4.
- 945 35. Seo GJ, Yang A, Tan B, Kim S, Liang Q, Choi Y, *et al.* Akt Kinase-Mediated  
946 Checkpoint of cGAS DNA Sensing Pathway. *Cell Rep* **2015**;13(2):440-9.
- 947 36. Topalian SL, Hodi FS, Brahmer JR, Gettinger SN, Smith DC, McDermott  
948 DF, *et al.* Safety, activity, and immune correlates of anti-PD-1 antibody in  
949 cancer. *N Engl J Med* **2012**;366(26):2443-54.
- 950 37. Abida W, Campbell D, Patnaik A, Shapiro JD, Sautois B, Vogelzang NJ, *et*  
951 *al.* Non-BRCA DNA Damage Repair Gene Alterations and Response to the  
952 PARP Inhibitor Rucaparib in Metastatic Castration-Resistant Prostate  
953 Cancer: analysis from the phase 2 TRITON2 study. *Clin Cancer Res* **2020**.

- 954 38. Caracciolo D, Scionti F, Juli G, Altomare E, Golino G, Todoerti K, *et al.*  
955 Exploiting MYC-induced PARPness to target genomic instability in multiple  
956 myeloma. *Haematologica* **2020**.
- 957 39. Ning JF, Stanciu M, Humphrey MR, Gorham J, Wakimoto H, Nishihara R,  
958 *et al.* Myc targeted CDK18 promotes ATR and homologous recombination  
959 to mediate PARP inhibitor resistance in glioblastoma. *Nat Commun*  
960 **2019**;10(1):2910.
- 961 40. Wu J, Sun L, Chen X, Du F, Shi H, Chen C, *et al.* Cyclic GMP-AMP is an  
962 endogenous second messenger in innate immune signaling by cytosolic  
963 DNA. *Science* **2013**;339(6121):826-30.
- 964 41. Corrales L, Glickman LH, McWhirter SM, Kanne DB, Sivick KE, Katibah GE,  
965 *et al.* Direct Activation of STING in the Tumor Microenvironment Leads to  
966 Potent and Systemic Tumor Regression and Immunity. *Cell Rep*  
967 **2015**;11(7):1018-30.
- 968 42. Corrales L, Matson V, Flood B, Spranger S, Gajewski TF. Innate immune  
969 signaling and regulation in cancer immunotherapy. *Cell Res* **2017**;27(1):96-  
970 108.
- 971 43. Juvekar A, Burga LN, Hu H, Lunsford EP, Ibrahim YH, Balmana J, *et al.*  
972 Combining a PI3K inhibitor with a PARP inhibitor provides an effective  
973 therapy for BRCA1-related breast cancer. *Cancer Discov* **2012**;2(11):1048-  
974 63.

- 975 44. Vagner T, Spinelli C, Minciacchi VR, Balaj L, Zandian M, Conley A, *et al.*  
976 Large extracellular vesicles carry most of the tumour DNA circulating in  
977 prostate cancer patient plasma. *J Extracell Vesicles* **2018**;7(1):1505403.
- 978 45. Feng W, Dean DC, Hornicek FJ, Shi H, Duan Z. Exosomes promote pre-  
979 metastatic niche formation in ovarian cancer. *Mol Cancer* **2019**;18(1):124.
- 980 46. Li FX, Liu JJ, Xu F, Lin X, Zhong JY, Wu F, *et al.* Role of tumor-derived  
981 exosomes in bone metastasis. *Oncol Lett* **2019**;18(4):3935-45.
- 982 47. Diamond JM, Vanpouille-Box C, Spada S, Rudqvist NP, Chapman JR,  
983 Ueberheide BM, *et al.* Exosomes Shuttle TREX1-Sensitive IFN-Stimulatory  
984 dsDNA from Irradiated Cancer Cells to DCs. *Cancer Immunol Res*  
985 **2018**;6(8):910-20.
- 986 48. Weischenfeldt J, Porse B. Bone Marrow-Derived Macrophages (BMM):  
987 Isolation and Applications. *CSH Protoc* **2008**;2008:pdb prot5080.
- 988  
989  
990  
991  
992  
993  
994

995 **FIGURE LEGENDS**

996 **Figure 1: The immune infiltrates within human mCRPC and murine c-myc-**  
997 **driven PC tumors are dominated by tumor-associated macrophages (TAMs).**

998 Single cell suspensions from human mCRPC biopsies, murine Myc-CAP and B6-  
999 Myc syngeneic tumors were stained with anti-human/mouse lineage-specific  
1000 antibodies and analyzed by flow cytometry. **(A,E,I)** Tumor cells (CD45-) vs.  
1001 Immune cells (CD45+); **(B,F,J)** Lymphoid - T (CD3+) + B (CD19+) cells vs. Myeloid  
1002 (CD11b+; macrophages, DCs, MDSCs – monocytic and granulocytic) cells.  
1003 **(C,G,K)** Lymphoid and Myeloid compartments were analyzed for individual  
1004 immune cell subsets using the following additional markers: Macrophages  
1005 (hCD45+CD11b+CD163+CD68+/mCD45+CD11b+F480+), DCs (hCD45+CD11b+  
1006 CD11c+/mCD45+CD11b+CD11c+), Gr-MDSCs (hCD45+CD11b+HLA-DR- CD15<sup>hi</sup>  
1007 CD33<sup>lo</sup>/mCD45+CD11b+MHC-II-Ly6G<sup>hi</sup>Ly6C<sup>lo</sup>), Mo-MDSCs (hCD45+CD11b+  
1008 HLA-DR-CD15<sup>lo</sup>CD33<sup>hi</sup>/mCD45+CD11b+MHC-II-Ly6G<sup>lo</sup>Ly6C<sup>hi</sup>); **(D,H,L)** HLA-DR  
1009 expression on TAMs in mCRPC & MHC-II expression on TAMs within TME of  
1010 murine tumors were analyzed; n=4 for human and n= 3-4 for murine samples.  
1011 DC=dendritic cells; MDSC= myeloid derived suppressor cell, h= human, m=  
1012 mouse.

1013

1014 **Figure 2: High-risk PC patients exhibit reduced STING, myeloid activation**  
1015 **and T cell chemotactic factor gene expression. (A)** cGAS and STING  
1016 expression in normal vs. PC within the TCGA. **(B)** PC patients in TCGA were  
1017 further subdivided into Low and High Gleason score groups, defined as follows:

1018 Low Gleason score = 6/7 and High Gleason Score  $\geq 8$ . Frequency of biochemical  
1019 recurrence (BCR) for evaluable cases within these cohorts was determined and  
1020 differential gene expression across the two groups was further analyzed for STING  
1021 **(C)**, indicated myeloid activation-specific genes **(D-E)** and T cell chemotactic  
1022 factors **(F-G)** secreted downstream of STING activation; n= 290 (Low Gleason  
1023 group n= 211; High Gleason group n= 79); Significance/p-values were calculated  
1024 using Mann Whitney/Un-paired t-test for panels (A, C-G) and Kolmogorov Smirnov  
1025 test for panel (B) and indicated as follows, \*p < 0.05; \*\*p < 0.01; \*\*\*\*p < 0.0001.  
1026 BCR=BioChemical Recurrence.

1027

1028 **Figure 3: PARPi/PD-1 targeted combination therapy shows lack of efficacy in**  
1029 **PC co-clinical trials, which can be reversed by concomitant PI3Ki treatment.**

1030 **(A)** mCRPC patients were enrolled in a Phase Ib rucaparib/nivolumab co-clinical  
1031 trial at University of Chicago, and treated until disease progression or  
1032 unacceptable toxicity. As part of the study, blood was processed to collect sera for  
1033 ELISA based determination of PSA levels at baseline and every month on study.  
1034 Data obtained was used to calculate percent change in PSA levels at  
1035 approximately 90 days, relative to baseline values. Each bar represents a single  
1036 patient. \* indicates patient who progressed early at 41 days, as per RECIST  
1037 guidelines; n = 7 patients. **(B-C)** B6-Myc (STING<sup>hi</sup>) tumor-bearing syngeneic mice  
1038 were treated with the indicated drug(s) and euthanized when untreated tumors  
1039 reached approx. 2500 mm<sup>3</sup>. Tumor volume curves for duration of treatment are  
1040 shown. **(D-G)** Single-cell suspensions were generated from harvested tumors and

1041 analyzed by flow cytometry for the indicated immune cell populations and their  
1042 activation states. Data are represented relative to CD45+ immune cells. n=3  
1043 animals per treatment group from 2 independent experiments. Significance/p-  
1044 values were calculated by one-way ANOVA/paired t-test and indicated as follows:  
1045 \*p < 0.05; \*\*p < 0.01; \*\*\*p < 0.001; ns = not statistically significant.

1046

1047 **Figure 4: ADT/PARPi/PI3Ki combination induces TAM-driven tumor control**  
1048 **in Myc-CAP (STING<sup>lo</sup>) syngeneic mice. (A-B)** Myc-CAP (STING<sup>lo</sup>) tumor-bearing  
1049 syngeneic mice were treated with the indicated drug(s) until untreated tumors  
1050 reached approx. 2500 mm<sup>3</sup>. Tumor volume curves for duration of treatment are  
1051 shown. **(C-F)** Single-cell suspensions were generated from harvested tumors and  
1052 analyzed by flow cytometry for the indicated immune cell populations and their  
1053 activation states. Data are represented relative to CD45+ immune cells. n=3-5  
1054 animals per treatment group from 2 independent experiments. Significance/p-  
1055 values were calculated by one-way ANOVA and are indicated as follows: \*p < 0.05;  
1056 \*\*p < 0.01, \*\*\*p < 0.001; \*\*\*\*p < 0.0001; ns= not statistically significant.

1057

1058 **Figure 5: PARPi/PI3K treatment activates tumor-cell extrinsic cGAS/STING**  
1059 **pathway within TAMs *in vivo*, via MV surface-associated DNA DSBs released**  
1060 **from tumor cells. (A)** Syngeneic mice were engrafted with Myc-CAP (STING<sup>lo</sup>)  
1061 cells, and tumors were harvested when the tumor volume reached 400 mm<sup>3</sup>. Single  
1062 cell suspensions of the tumors were treated with the indicated drug(s), in the  
1063 presence or absence of GW4869 (MV biogenesis inhibitor). **(B)** Bone marrow

1064 derived macrophage (BMDMs) were co-cultured for 30 hours with supernatants (-  
1065 /+ exogenous 50 units of DNase I pre-treatment for 30 minutes) from Myc-CAP  
1066 cells that were treated with the indicated drug(s) for 36 hours. **(C)** cGAMP (10  
1067 µg/ml) was pre-incubated with 10 units of DNase I or mock control for 30 minutes  
1068 and then treated with BMDMs for 30 hours. **(D-G)** STING<sup>+/+</sup>/STING<sup>-/-</sup> BMDMs were  
1069 co-cultured for 36 hours with supernatants from Myc-CAP and B6-Myc cancer  
1070 cells, that were treated with the indicated drug(s) for 36 hours. Supernatants were  
1071 collected from **A-G** at the end of treatment and analyzed for IFNβ1 by ELISA. **(H)**  
1072 Myc-CAP (STING<sup>lo</sup>) tumor-bearing mice were treated with the indicated drug(s)  
1073 until tumors first reached approx. 2500 mm<sup>3</sup>. For the degerelix/rucaparib/buparlisib  
1074 combination, additional cohorts of mice underwent concomitant treatment with  
1075 STING antagonist H-151 or GW4869. Tumor volume was recorded daily for  
1076 duration of experiment. For *in vitro* experiments, n=2 independent experiments and  
1077 for *in vivo* experiments n= 3-4 animals /group. Significance/p-values were  
1078 calculated by one-way ANOVA and are indicated as follows, \*p < 0.05; \*\*p < 0.01,  
1079 \*\*\*p < 0.001; \*\*\*\* p < 0.0001; ns = not statistically significant;

1080

1081 **Figure 6: Optimal STING activation within macrophages requires both**  
1082 **PARPi-mediated MV surface-associated DNA DSBs and PI3Ki-induced de-**  
1083 **repression of cGAS enzymatic activity. (A)** Experimental schema: Myc-CAP  
1084 (STING<sup>lo</sup>) cells were treated with rucaparib (0.5 µM) for 36 hours, followed by  
1085 isolation of MVs from supernatant (R-MVs), which were then co-cultured with  
1086 BMDMs in the presence/absence of buparlisib (1 µM) for 36 hours. BMDMs were



1087 directly treated with DMXAA (50 µg/ml). **(B-C)** Cellular metabolites and proteins  
1088 extracted from co-cultured BMDMs (as per schema in **A**) were used for cGAMP  
1089 ELISA **(B)** and for assessment of activation of STING pathway by western blotting  
1090 using indicated antibodies **(C)**, respectively. **(D-E)** Supernatants collected from  
1091 experiment in **(A)** were used for IFN-α **(D)** and IFN-β ELISA **(E)**. **(F)** Model for  
1092 cGAS/STING pathway activation within suppressive macrophages (M2) following  
1093 treatment with buparlisib and MVs (isolated from rucaparib-treated Myc-CAP  
1094 cells); n=2 independent experiments. Significance/ p-values were calculated by  
1095 one-way ANOVA and are indicated as follows, \*p < 0.05; \*\*p < 0.01, \*\*\*p < 0.001,  
1096 \*\*\*\* p < 0.0001, ns = not statistically significant.

1097

1098 **Figure 7: The combination of buparlisib with MV surface-associated DNA**  
1099 **DSBs from PARPi treated cancer cells reprograms macrophages from an M2**  
1100 **to M1 phenotype.** Myc-CAP (STING<sup>lo</sup>) cells were treated with rucaparib (0.5 µM)  
1101 for 36 hours, followed by isolation of MVs from supernatant (R-MVs), which were  
1102 then co-incubated with BMDMs in the presence/absence of buparlisib (1 µM) for  
1103 36 hours. As a positive control, BMDMs were directly treated with DMXAA (50  
1104 µg/ml). At the end of treatment, BMDMs were analyzed by flow cytometry for  
1105 macrophage activation markers to quantify frequency of CD45+CD11b+F4/80+  
1106 cells expressing MHC-II **(A)** and CD86 **(B)**. **(C-E)** Supernatants were collected for  
1107 determination of M1-specific cytokines/chemokines by cytokine array; n=2  
1108 independent experiments; Significance/ p-values were calculated by one-way  
1109 ANOVA and are indicated as follow, \*p < 0.05; \*\*p < 0.01, \*\*\*p < 0.001, \*\*\*\* p <

1110 0.0001, ns = not statistically significant. **(F)** Working Model: The combination of  
1111 PARPi + PI3Ki induces intracellular DNA DSBs, that become associated with the  
1112 surface of extracellular MVs following release into the TME. In addition, PI3Ki can  
1113 inhibit AKT-mediated Ser-291 phosphorylation of cGAS, thus de-repressing its  
1114 enzymatic activity. MV surface-associated DNA DSBs can secondarily activate the  
1115 cGAS/STING pathway within TAMs only in the presence of concomitant PI3Ki,  
1116 resulting in macrophage activation and M2 to M1 polarization, increased T cell  
1117 infiltration, and tumor regression in c-myc driven PC.  
1118

1119 **SUPPLEMENTARY FIGURE LEGENDS**

1120 **Supplementary Figure 1: Differential STING pathway activation within B6-**

1121 **Myc (STING<sup>hi</sup>) cell lines and BMDMs, relative to Myc-CAP (STING<sup>lo</sup>) cells. (A,**

1122 **B)** The indicated cancer cell lines and BMDMs were treated with DMXAA for 1 and

1123 24 hours, respectively and protein extracts were interrogated for cGAS/STING

1124 pathway activation with the indicated antibodies by Western blotting. Supernatants

1125 were collected for IFN $\beta$ 1 ELISA, after the indicated cells were treated with DMXAA

1126 for 36 hours **(B, D)**. **(E)** Syngeneic Myc-CAP (STING<sup>lo</sup>) tumors were processed

1127 into single cell suspensions and used for phycoerythrin-based sorting of CD45+

1128 cellular fractions. Equal number of cells from whole tumor and CD45 Negative

1129 fractions were stimulated with DMXAA. Supernatants were collected at 36 hrs for

1130 detection of IFN $\beta$ 1 by ELISA; n=3 independent experiments; Significance/p-

1131 values were calculated by one-way ANOVA (C& E), paired t-test (D) and indicated

1132 as follows, \*\*\*p < 0.001; TAM = tumor associated macrophages; s.e. = short

1133 exposure; l.e. = long exposure

1134

1135 **Supplementary Figure 2: PARPi/PI3Ki combination induces intracellular DNA**

1136 **DSBs, and proportionate release of MV surface-associated DNA DSBs from**

1137 **B6-Myc (STING<sup>hi</sup>) cancer cells, without affecting cellular viability. B6-Myc**

1138 **(STING<sup>hi</sup>)** cells were treated with indicated drugs singly or in combination for 36

1139 hours. **(A)** Cells were stained with anti-mouse specific p- $\gamma$ H2AX antibody and

1140 fluorescently labeled secondary antibody for determination of DNA DSBs, which

1141 were quantified by confocal microscopy. **(B)** Protein extracts from cells in **(A)** were

1142 analyzed for the indicated pharmacodynamic biomarkers by western blotting. **(C)**  
1143 Annexin V-PI staining was done to assess frequency of live cells (Annexin V<sup>-</sup> PI<sup>-</sup>)  
1144 following drug treatment. **(D)** Ultracentrifugation was utilized to purify MVs from  
1145 supernatants in indicated treatment groups **(A)**, and associated DNA DSBs was  
1146 quantified by Nanodrop; n= 2 independent experiments. Significance/p-values  
1147 were calculated by one-way ANOVA and indicated as follows \*p < 0.05; \*\*p < 0.01;  
1148 \*\*\*p < 0.001.

1149

1150 **Supplementary Figure 3: Buparlisib and Rucaparib inhibit intratumoral Pi3K**  
1151 **and PARP enzymatic activity, respectively, within B6-Myc (STING<sup>hi</sup>) and Myc-**  
1152 **CAP (STING<sup>lo</sup>) tumors.** Subcutaneous Myc-CAP (STING<sup>lo</sup>) and B6-Myc (STING<sup>hi</sup>)  
1153 tumors at 400-500mm<sup>3</sup> volumes were treated with either buparlisib (pan-PI3K  
1154 inhibitor, 30mg/kg) or rucaparib (PARP inhibitor, 150mg/kg) by oral gavage daily  
1155 for 7 days. At end of treatment, both **(A)** B6-Myc (STING<sup>hi</sup>) and **(B)** Myc-CAP  
1156 (STING<sup>lo</sup>) tumors were harvested and protein extracts utilized for assessment of  
1157 target inhibition with the indicated antibodies by Western blotting. n=2 mice per  
1158 treatment group.

1159

1160 **Supplementary Figure 4: The anti-tumor response elicited by PARPi/PI3K is**  
1161 **abrogated in B6-Myc (STING<sup>hi</sup>)-tumor bearing athymic nude mice.** B6-Myc  
1162 (STING<sup>hi</sup>) tumor-bearing athymic nude mice were treated with the indicated drug(s)  
1163 for approximately 12 days. Tumor volume curves for duration of treatment are

1164 shown; n= 3 animals/group; Significance/p-values were calculated by one-way  
1165 ANOVA and indicated as follows: ns = not statistically significant.

1166

1167 **Supplementary Figure 5: PARPi/PI3Ki-mediated tumor regression in B6-Myc**

1168 **(STING<sup>hi</sup>) model occurs via a DC-independent mechanism.** B6-Myc (STING<sup>hi</sup>)

1169 tumor-bearing syngeneic mice were treated with indicated drugs(s) until untreated

1170 tumors reached approx. 2500 mm<sup>3</sup>. Single-cell suspensions were generated from

1171 harvested tumors and analyzed by flow cytometry for % activated DCs gated on

1172 CD45+CD11b+ MHC-II+ CD11C+. Data are represented relative to CD45+

1173 immune cells. n=3-4 per group.

1174

1175 **Supplementary Figure 6: PARPi/PI3Ki/PD-L1 treatment increases CD4 T cell**

1176 **infiltration within the TME of STING<sup>hi</sup> B6-Myc tumors.** B6-Myc (STING<sup>hi</sup>) tumor-

1177 bearing syngeneic mice were treated with the indicated drug(s) until untreated

1178 tumors reached approx. 2500 mm<sup>3</sup>. Single-cell suspensions were generated from

1179 harvested tumors and analyzed by flow cytometry for CD4 infiltration **(A)** and **(B)**

1180 activation. Data are represented relative to CD45+ immune cells. Animals per

1181 treatment group n=3-5 from 2 independent experiments; Significance/p-values

1182 were calculated by one-way ANOVA and indicated as follows: \*p < 0.05; \*\*p < 0.01,

1183 \*\*\*p < 0.001; ns = not statistically significant.

1184

1185 **Supplementary Figure 7: Concomitant clodronate treatment decreases MHC-**

1186 **I expression on CD45<sup>+</sup> cells in B6-Myc (STING<sup>hi</sup>) tumor-bearing mice that**

1187 **were treated with PARPi/PI3Ki treatment.** B6-Myc (STING<sup>hi</sup>) tumor-bearing  
1188 syngeneic mice were treated with PARPi/PI3Ki +/- clodronate (to deplete  
1189 macrophages) until untreated tumors reached 2500 mm<sup>3</sup>. Tumors were processed  
1190 and stained for MHC-I by flow cytometry; n=3 animals per group; Significance/ p-  
1191 values were calculated by one-way ANOVA, indicated as follows, \*\*p < 0.01.

1192

1193 **Supplementary Figure 8: PARPi/PI3Ki combination therapy causes tumor**  
1194 **regression in B6-Myc (STING<sup>hi</sup>) murine PC via host STING-dependent**  
1195 **immune mechanism.** C57Bl/6J<sup>STING+/+</sup> and C57Bl/6J<sup>STING-/-</sup> mice were engrafted  
1196 with B6-Myc (STING<sup>hi</sup>) tumor allografts and treated with the indicated drug(s) until  
1197 untreated tumors reached approx. 2500 mm<sup>3</sup>. **(A)** Tumor volume curves for  
1198 duration of treatment are shown. **(B)** Single-cell suspensions were generated from  
1199 harvested tumors, and analyzed by flow cytometry, for activated macrophages **(B)**  
1200 and activated T cells **(C)**. Data are represented relative to CD45+ immune cells.  
1201 n=3 mice per group; Significance/ p-values were calculated by one-way ANOVA  
1202 are indicated as follows, \*p < 0.05; \*\*\*\*p < 0.0001.

1203

1204 **Supplementary Figure 9: Myc-CAP (STING<sup>lo</sup>) tumors do not respond to**  
1205 **PARPi/PI3Ki treatment in the absence of castration.** Myc-CAP (STING<sup>lo</sup>) tumor-  
1206 bearing syngeneic mice were treated with the indicated drug(s) until untreated  
1207 tumors reached approx. 2500 mm<sup>3</sup>. Tumor volumes were recorded for duration of

1208 treatment; n=4 animals per group. Significance/p-values were calculated by one-  
1209 way ANOVA and are indicated as follows: ns = not statistically significant.

1210

1211 **Supplementary Figure 10: Chemical castration increases macrophage and**  
1212 **CD4+ T cell infiltration and PD-L1 expression within the TME of Myc-CAP**  
1213 **(STING<sup>lo</sup>) tumors.** Myc-CAP (STING<sup>lo</sup>) tumor-bearing syngeneic mice were  
1214 treated with degarelix (chemical castration) for 10 days. At the end of treatment,  
1215 tumors were harvested and analyzed by flow cytometry for infiltration of CD45+  
1216 immune cells **(A)**, macrophages **(B)** and CD4/CD8 T cells **(C-D)**. Mean  
1217 fluorescence intensity (MFI) are depicted for PD-L1 expression on CD45-/CD45+  
1218 cells **(E-F)** and TAMs **(G)** within the TME; n= 3-5 animals/group; Significance/ p-  
1219 values were calculated by Un-paired t-test and indicated as follows \*p < 0.05; ns=  
1220 not statistically significant.

1221

1222 **Supplementary Figure 11: The anti-tumor response elicited by**  
1223 **ADT/PARPi/PI3Ki is abrogated in Myc-CAP (STING<sup>lo</sup>)-tumor bearing athymic**  
1224 **nude and NOD/SCID mice.** Immunodeficient athymic nude **(A)** and NOD-SCID  
1225 **(B)** mice were engrafted with Myc-CAP (STING<sup>lo</sup>) tumors and treated with the  
1226 indicated drug(s) until untreated tumors reached approx. 2000mm<sup>3</sup>. Tumor volume  
1227 curves for duration of treatment are shown. n=3-4 mice per group.

1228

1229 **Supplementary Figure 12: ADT/PARPi/PI3Ki with/without PD-L1 antibody**  
1230 **treatment increases infiltration and activation of CD4 T cells within the TME**

1231 **of STING<sup>lo</sup> Myc-CAP tumors.** Myc-CAP (STING<sup>lo</sup>) tumor-bearing syngeneic mice  
1232 were treated with the indicated drugs until untreated tumors reached approx. 2500  
1233 mm<sup>3</sup>. Single-cell suspensions were generated from harvested tumors and  
1234 analyzed by flow cytometry for CD4 infiltration **(A)** and activation **(B)**. Data are  
1235 represented relative to CD45+ immune cells. n=3-5 animals per treatment group  
1236 from 2 independent experiments; Significance/ p-values were calculated by one-  
1237 way ANOVA and are indicated as follows, \*p < 0.05; \*\*p < 0.01, ns = not statistically  
1238 significant

1239

1240 **Supplementary Figure 13: ADT/PARPi/PI3Ki treatment enhances M1**

1241 **macrophage polarization within Myc-CAP (STING<sup>lo</sup>) tumors *in vivo*. (A-B)**

1242 Myc-CAP (STING<sup>lo</sup>) tumor-bearing syngeneic mice were treated with the indicated  
1243 drugs until untreated tumors reached approx. 2500 mm<sup>3</sup>. Tumors were harvested  
1244 for qRT-PCR analysis to interrogate changes in *il12b* expression. **(B)** Single-cell  
1245 suspensions were generated from harvested tumors and analyzed by flow  
1246 cytometry for macrophage (F4/80+) Arginase I expression. n=3 animals/group;  
1247 Significance/p-values were calculated by one-way ANOVA and are indicated as  
1248 follows \*p < 0.05, \*\*p < 0.01.

1249

1250 **Supplementary Figure 14: PARPi alone induces DNA DSBs, but no apoptosis**

1251 **even in combination with PI3Ki in Myc-CAP (STING<sup>lo</sup>) cancer cells.** Myc-CAP

1252 cancer cells were treated with indicated drugs singly or in combination for 36 hours.

1253 **(A)** Cells were stained with anti-mouse specific p-γH2AX antibody and



1254 fluorescently labeled secondary antibody for determination of DNA DSBs, which  
1255 were quantified by confocal microscopy. **(B)** Protein extracts from cells in **(A)** were  
1256 analyzed for the indicated pharmacodynamic biomarkers by western blotting; **(C)**  
1257 Annexin V-PI staining was done to assess frequency of live cells (Annexin V<sup>-</sup> PI<sup>-</sup>)  
1258 following drug treatment. **(D)** Ultracentrifugation was utilized to purify MVs from  
1259 supernatants in treatment groups in **(A)** and associated DNA DSBs was quantified  
1260 by Nanodrop. Independent experiments n=2. Significance/p-values were  
1261 calculated by one-way ANOVA and are indicated as follows \*\*p < 0.01;  
1262 \*\*\*p < 0.001; ns = not statistically significant.

1263

1264 **Supplementary Figure 15: Buparlisib inhibits activation of the PI3K/AKT**  
1265 **pathway within BMDMs.** BMDMs were co-cultured with MVs isolated from Myc-  
1266 CAP (STING<sup>lo</sup>) cancer cells following 36 hr treatment with rucaparib (R-MVs), in  
1267 the presence or absence of buparlisib at the indicated concentrations for 24 hrs.  
1268 Protein extracts were harvested for assessment of PI3K target inhibition by  
1269 Western Blotting; U= Untreated.

1270

1271 **Supplementary Figure 16: Conditioned medium from PARPi/PI3Ki treated**  
1272 **Myc-CAP (STING<sup>lo</sup>) cells reprograms BMDMs from an M2 to M1 phenotype.**  
1273 BMDMs were co-cultured for 36 hours with supernatants from Myc-CAP (STING<sup>lo</sup>)  
1274 cancer cells that were treated with the indicated drug(s) (rucaparib 0.5uM,  
1275 buparlisib 1uM) for 36 hours. DMXAA (50ug/ml) was directly added to BMDMs.  
1276 Following treatment, BMDMs were stained for expression of macrophage

1277 activation markers **(A)** MHC-II; **(B)** iNOS and suppressive marker **(C)** Arginase I  
1278 on CD45+ CD11b+F4/80+ macrophages. **(D-E)** Supernatants were collected for  
1279 determination of secreted chemokines by cytokine array; n=2 independent  
1280 experiments; Significance/ p-values were determined by one-way ANOVA (A) / Un-  
1281 paired t-test (B), \*p < 0.05; \*\*p < 0.01, \*\*\*p < 0.001, \*\*\*\* p < 0.0001, ns = not  
1282 statistically significant.

1283

1284 **Supplementary Figure 17: Conditioned medium from PARPi/PI3Ki treated**

1285 **Myc-CAP (STING<sup>lo</sup>) cells reprograms BMDMs from an M2 to M1 phenotype.**

1286 BMDMs were co-cultured for 36 hours with supernatants from Myc-CAP (STING<sup>lo</sup>)

1287 cancer cells that were treated with the indicated drug(s) (rucaparib 0.5uM,

1288 buparlisib 1uM) for 36 hours. DMXAA (50ug/ml) was directly added to BMDMs.

1289 Following treatment, BMDMs were stained for expression of macrophage

1290 activation markers **(A)** MHC-II; **(B)** iNOS and suppressive marker **(C)** Arginase I

1291 on CD45+ CD11b+F4/80+ macrophages. **(D-E)** Supernatants were collected for

1292 determination of secreted chemokines by cytokine array; n=2 independent

1293 experiments; Significance/ p-values were determined by one-way ANOVA,

1294 \*p < 0.05; \*\*p < 0.01, \*\*\*p < 0.001, \*\*\*\* p < 0.0001, ns = not statistically significant.

1295

1296

1297 **SUPPLEMENTARY TABLE LEGENDS**

1298 **Supplementary Table 1: Representative flow cytometric gating strategy,**

1299 **mean and standard deviations for specific immune subsets in human**

1300 **mCRPC and murine c-myc syngeneic tumor samples.** Single cell suspensions

1301 from human mCRPC biopsies, murine Myc-CAP and B6-Myc syngeneic tumors

1302 were stained with anti-human/mouse lineage-specific antibodies and analyzed by

1303 flow cytometry, as described in Figure 1. n=4 for human and n= 3-4 for murine

1304 samples. DC=dendritic cells; MDSC= myeloid derived suppressor cell, h= human,

1305 m= mouse.

1306

## mCRPC Patients

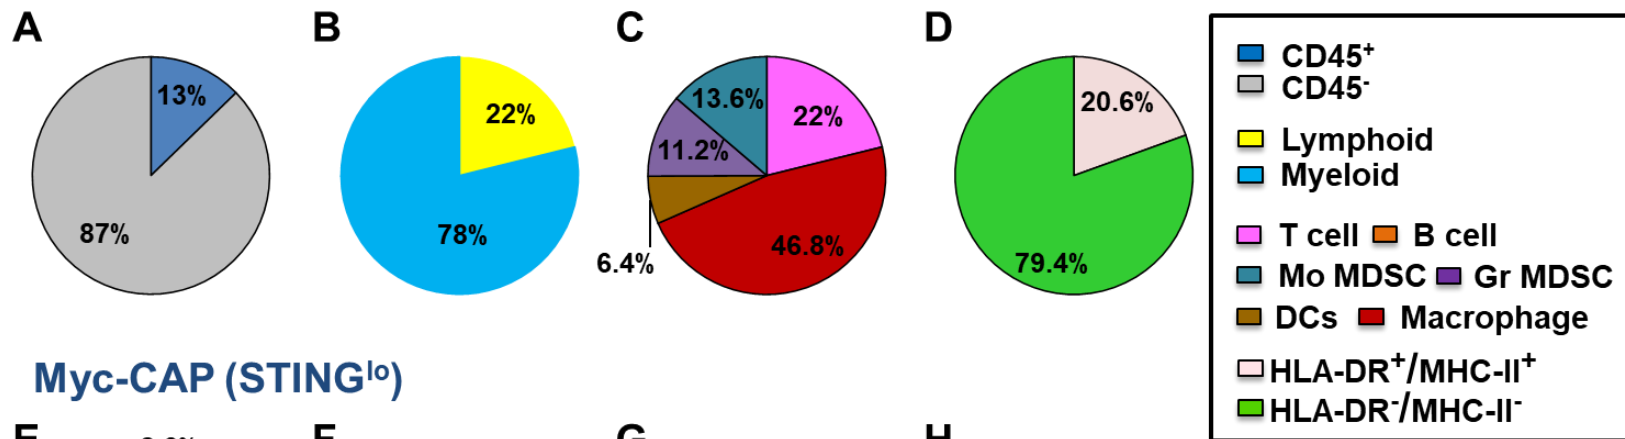

## Myc-CAP (STING<sup>lo</sup>)

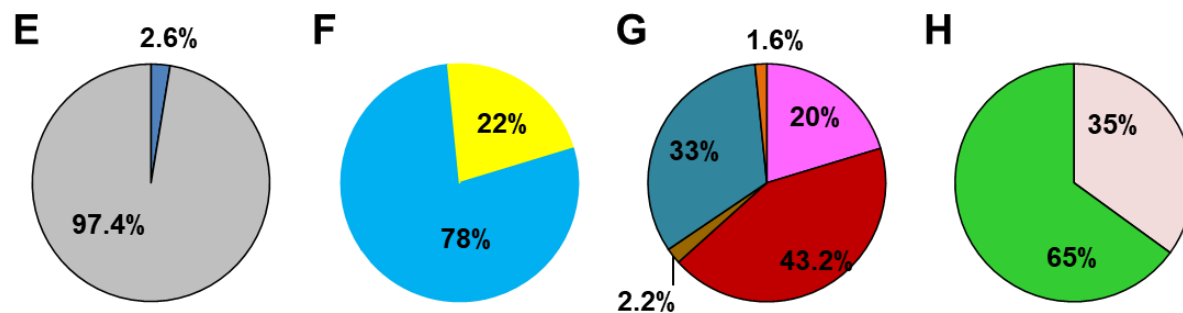

## B6-Myc (STING<sup>hi</sup>)

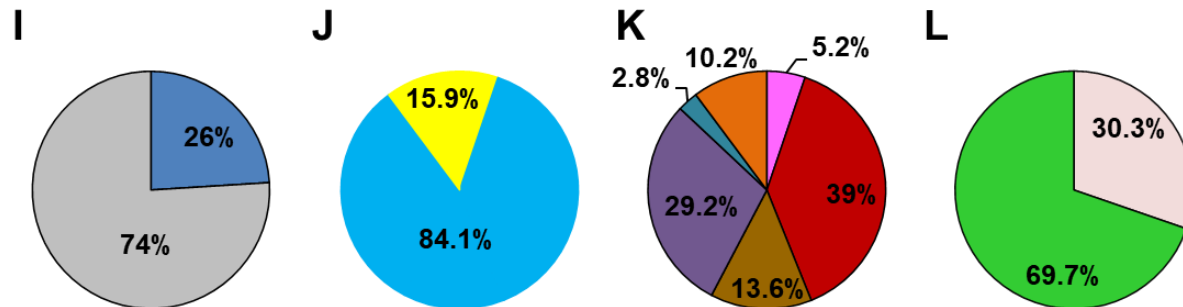

Figure 1

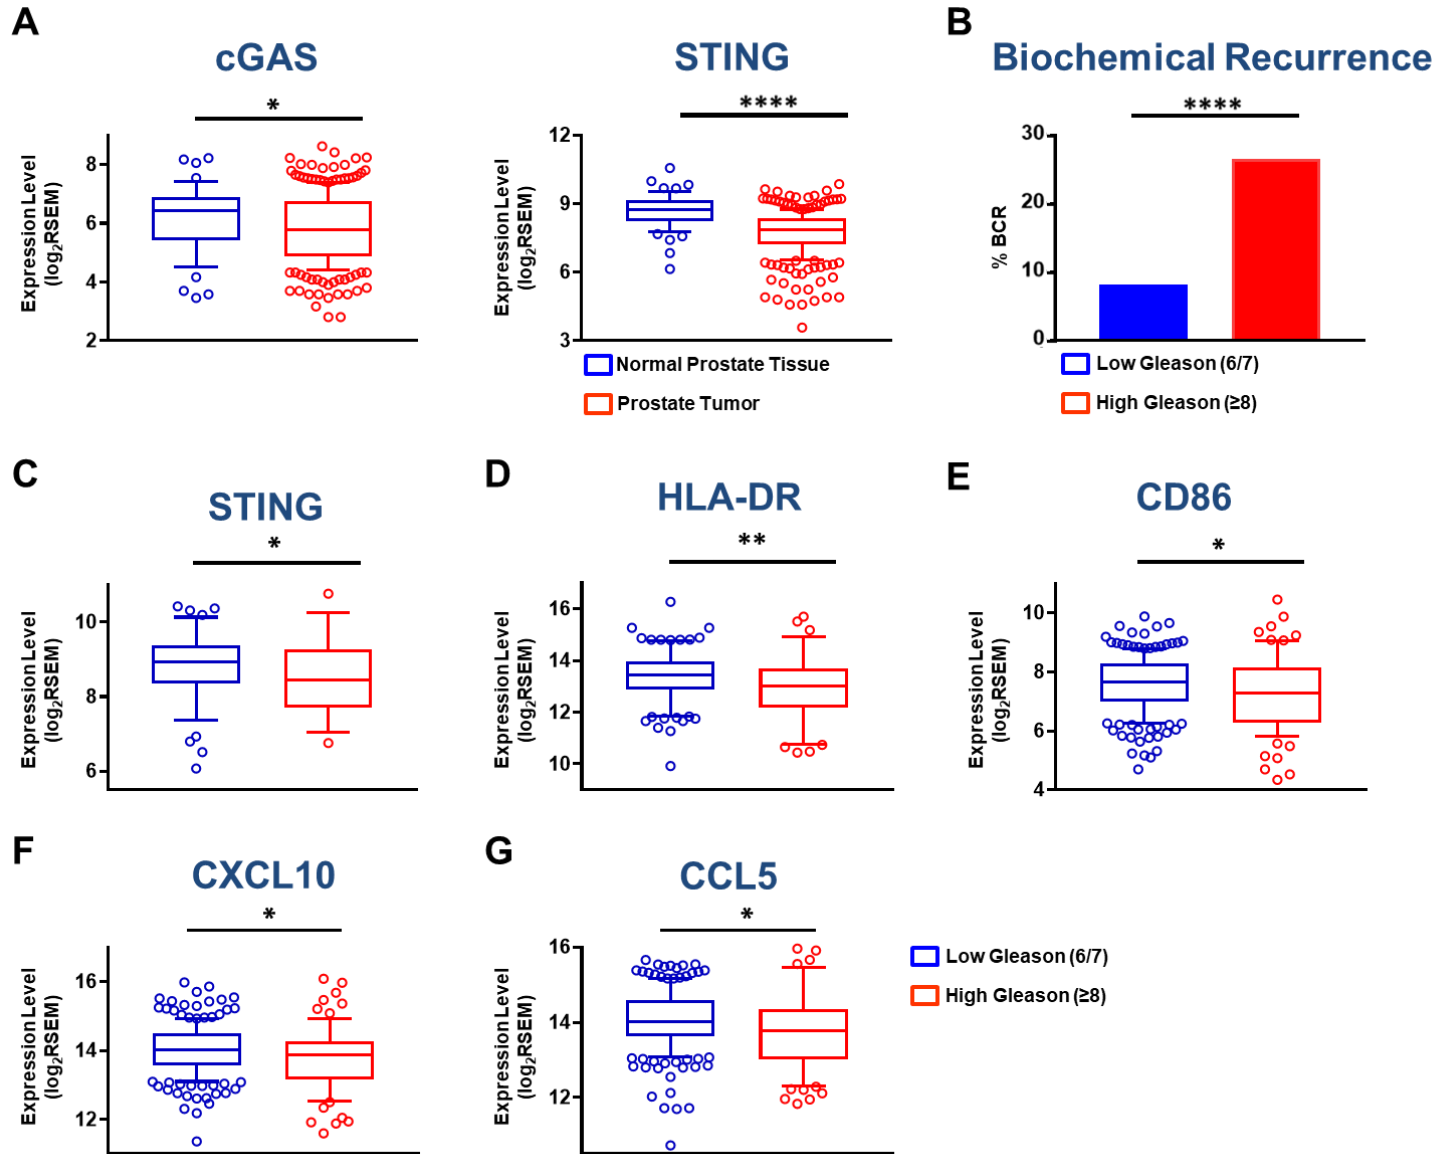

**Figure 2**

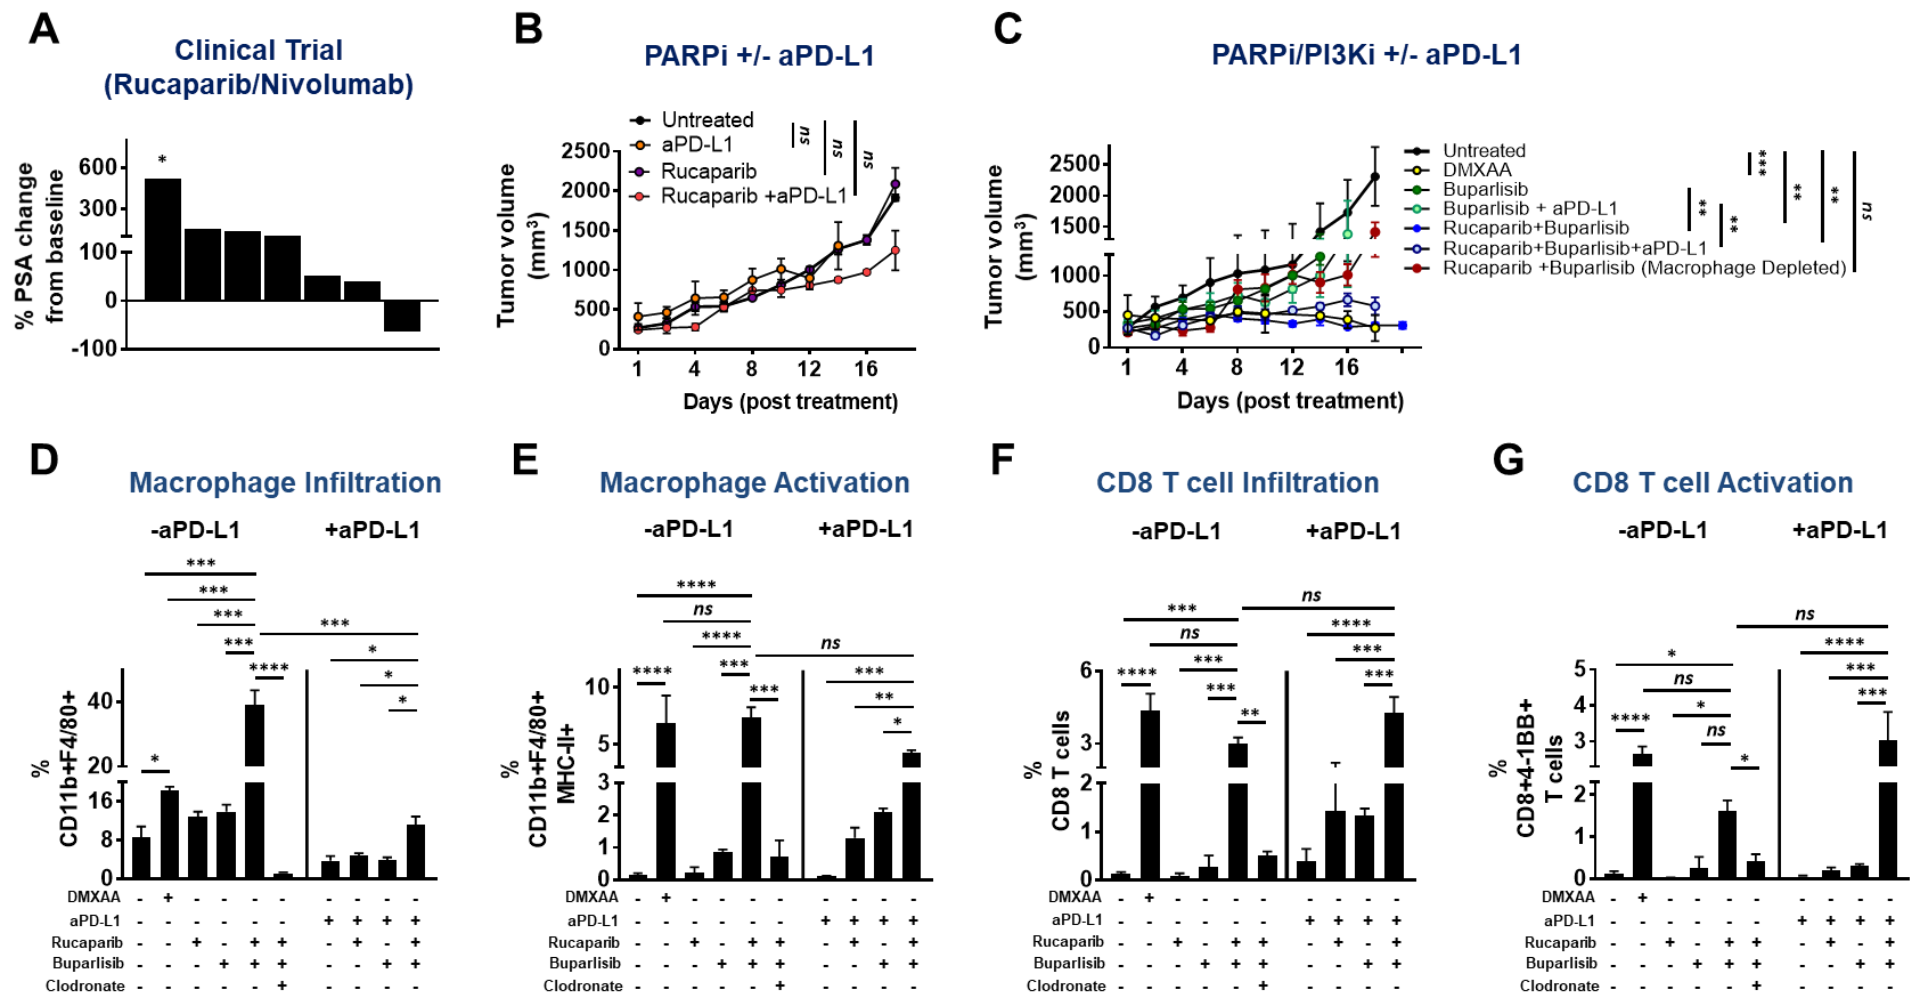

**Figure 3**

**A****PARPi +/- aPD-L1**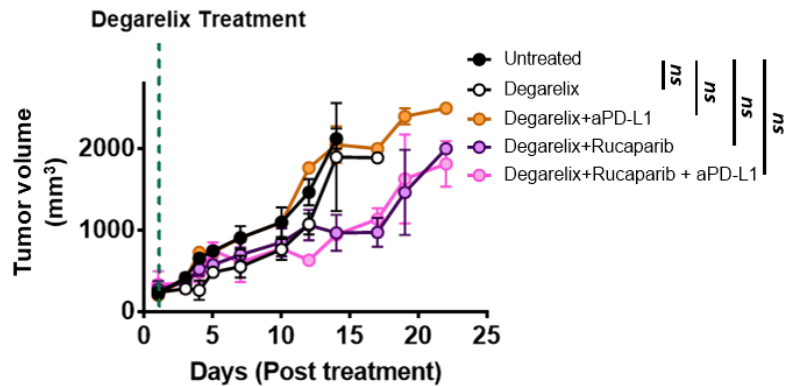**B****PARPi/PI3Ki +/- aPD-L1**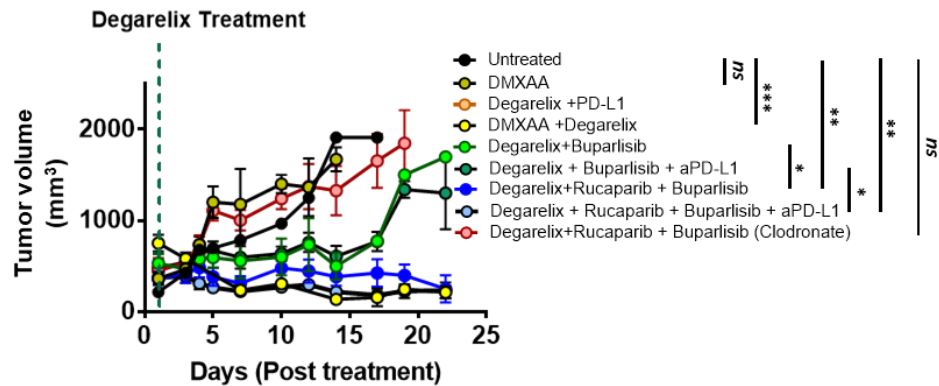**C****Macrophage Infiltration**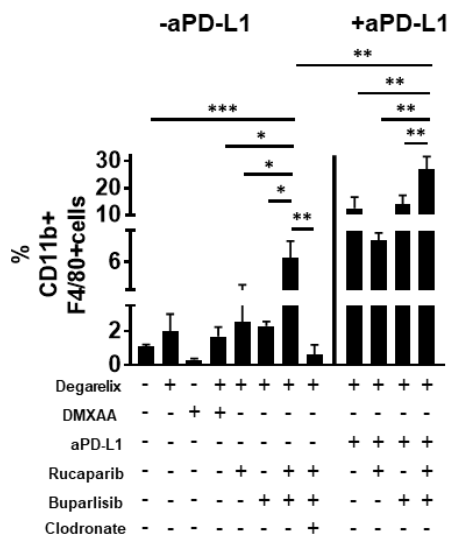**D****Macrophage Activation**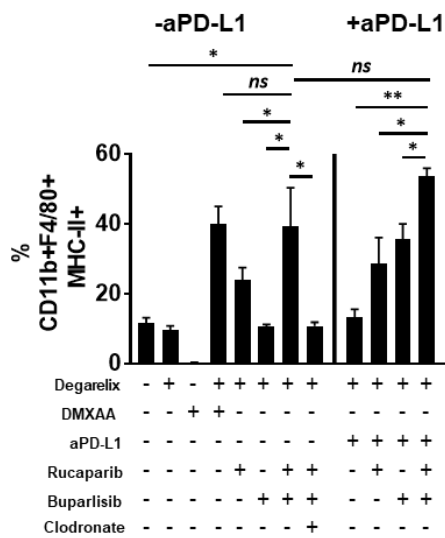**E****CD8 T cell Infiltration**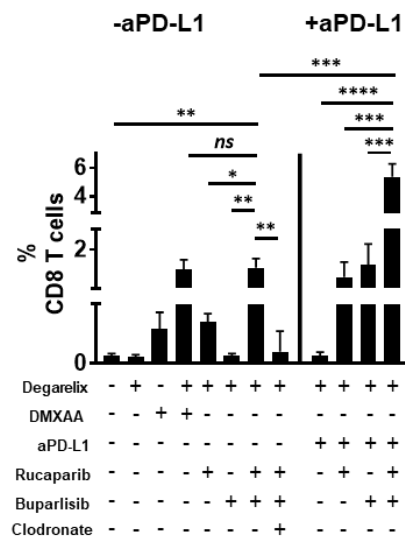**F****CD8 T cell Activation**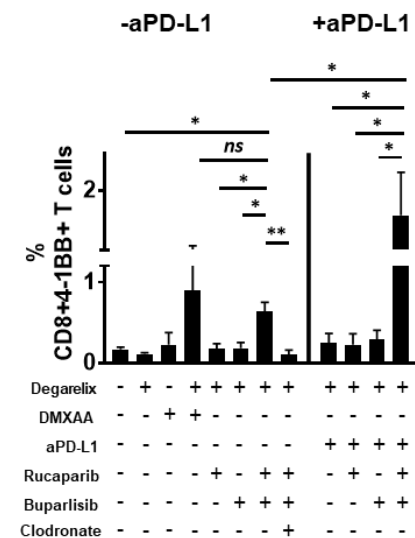**Figure 4**

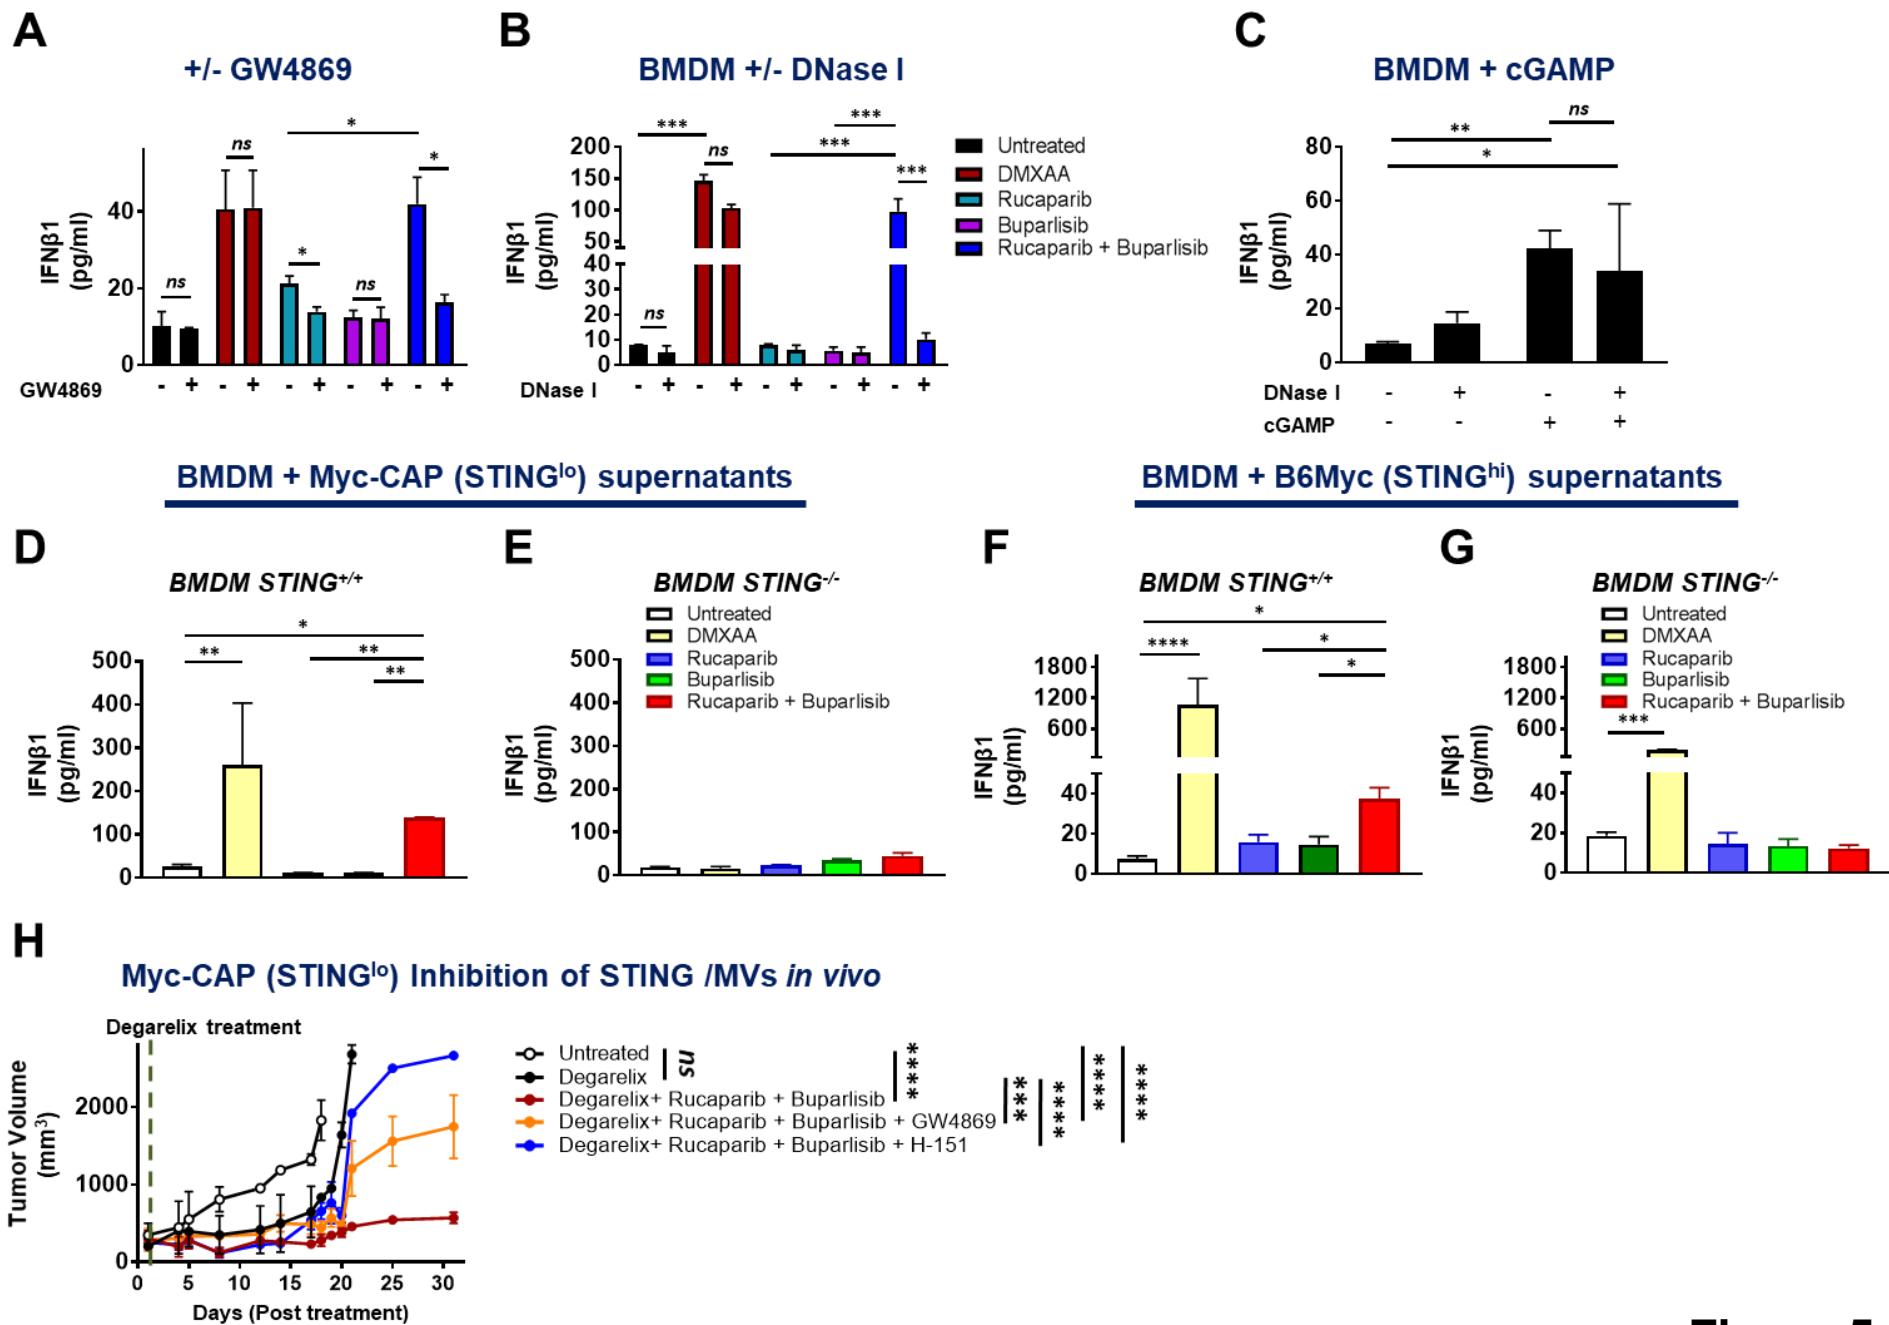

**Figure 5**



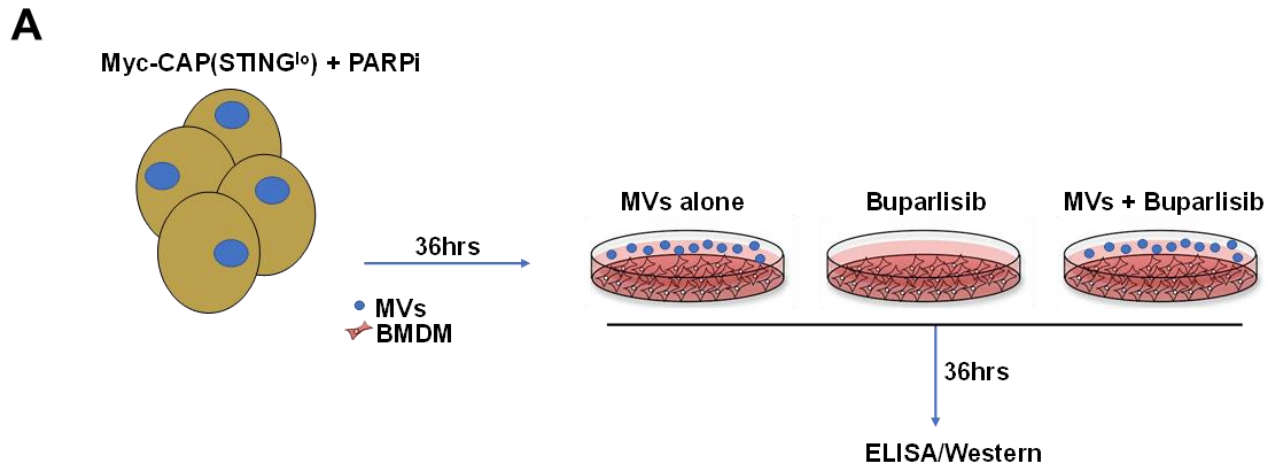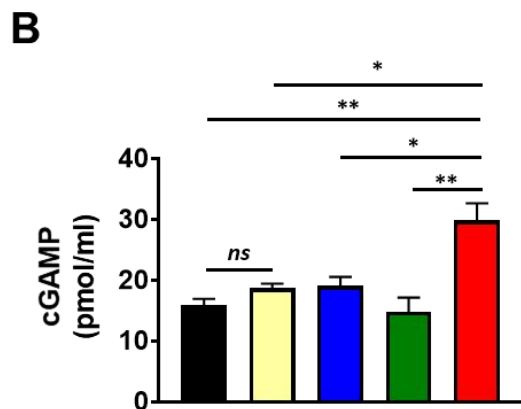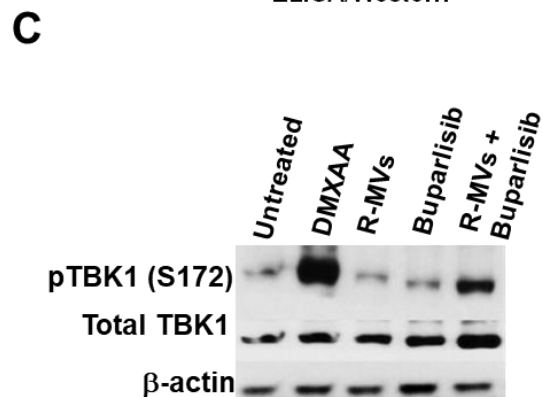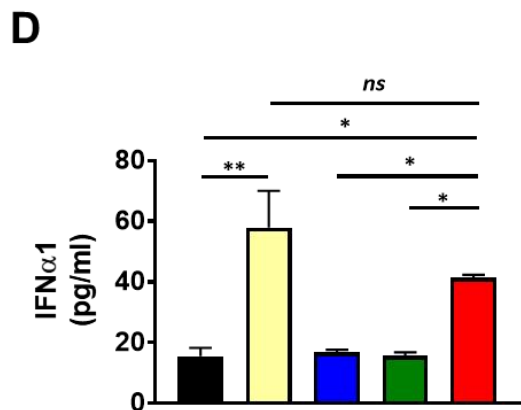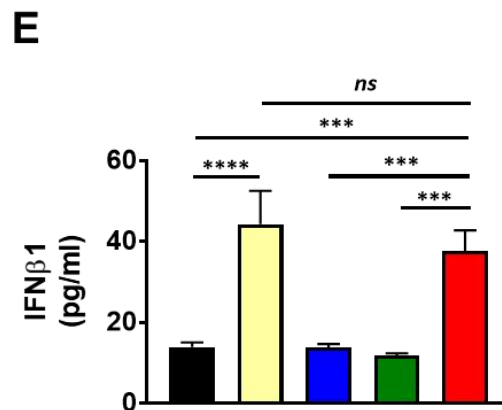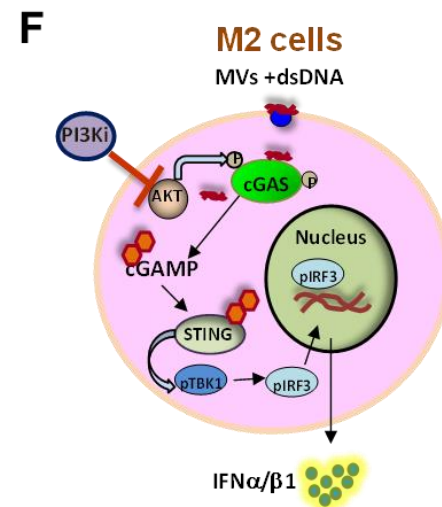

■ Untreated    □ DMXAA    ■ R-MVs    ■ Buparlisib    ■ R-MVs + Buparlisib

**Figure 6**

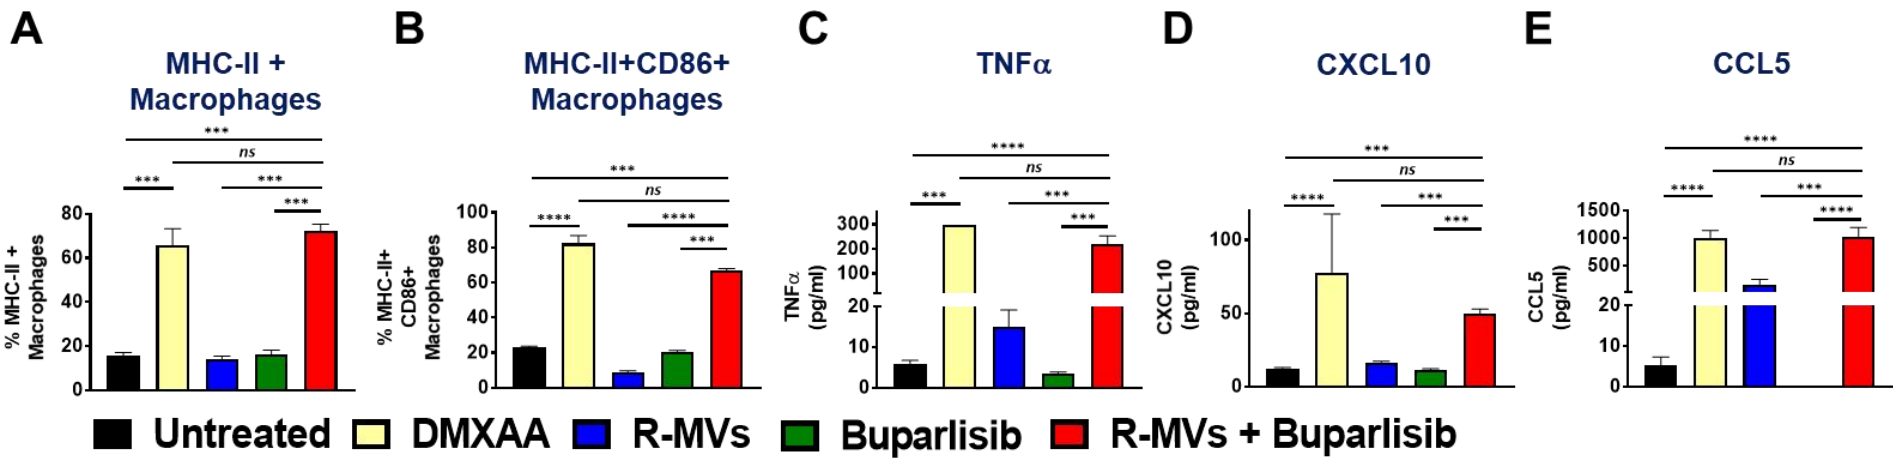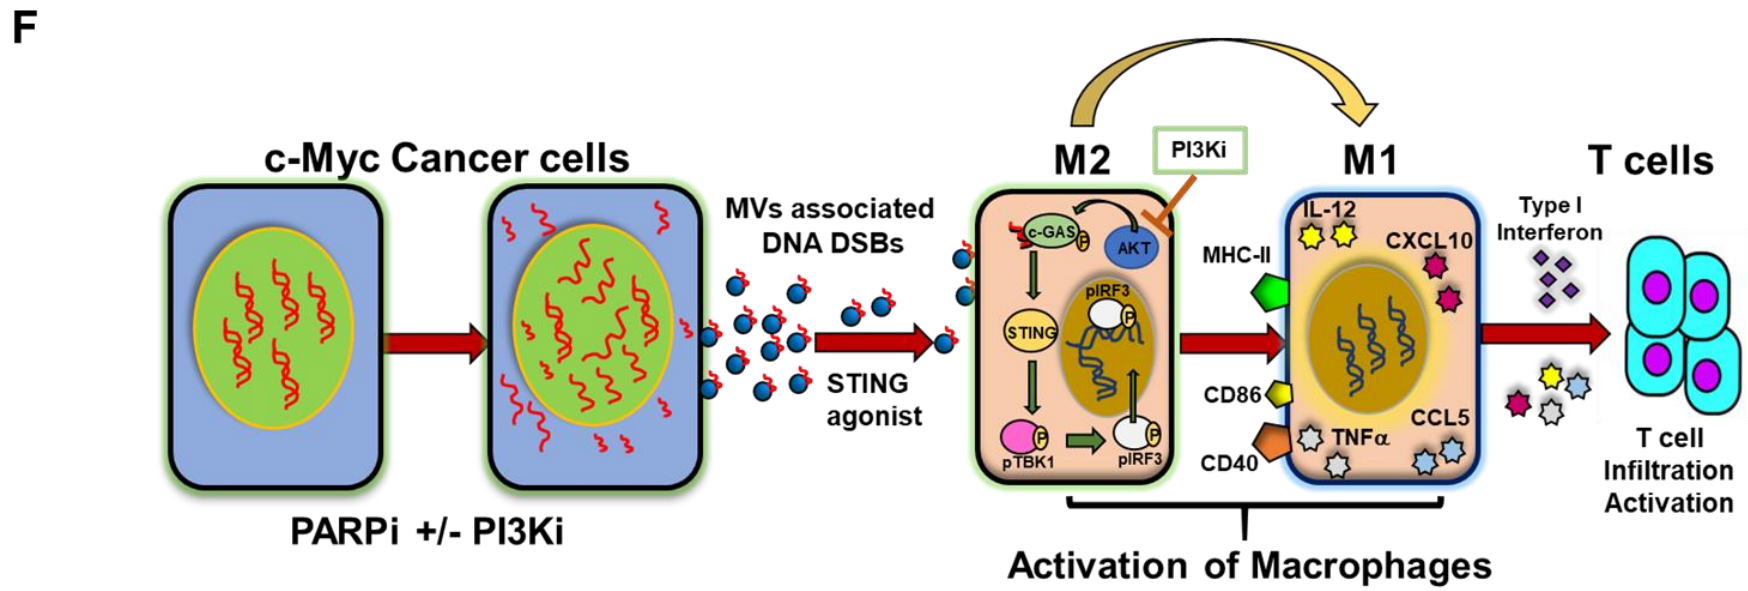

**Figure 7**

**A**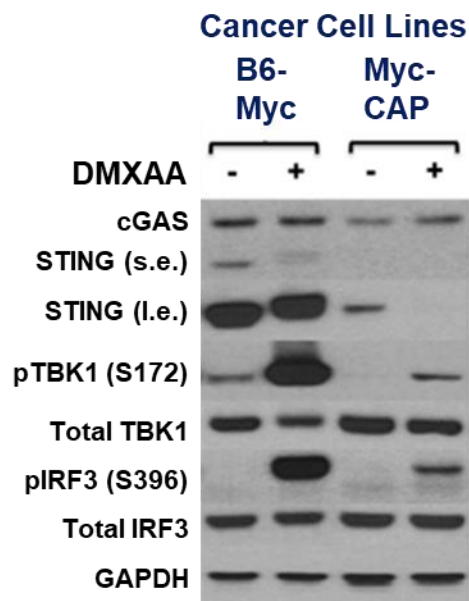**B**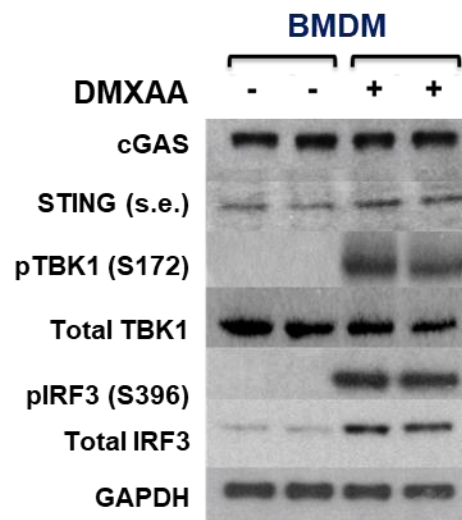**C**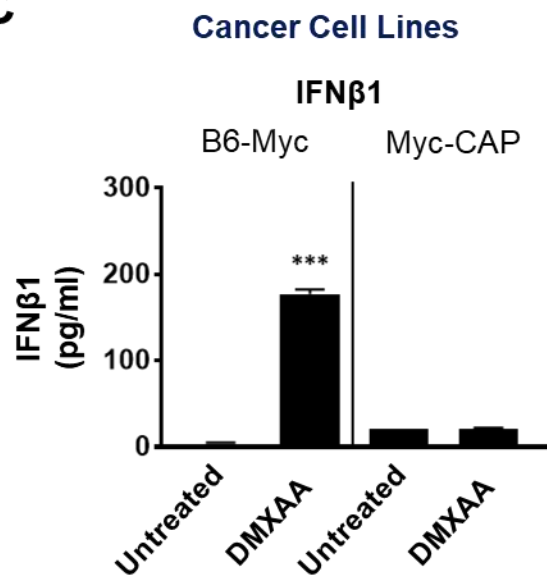**D**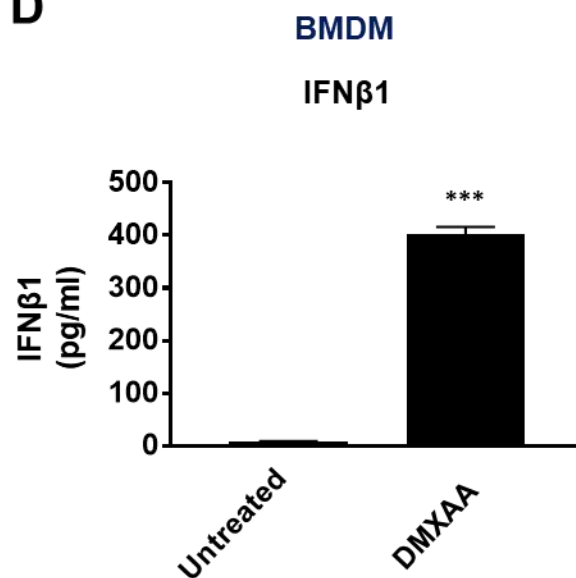**E**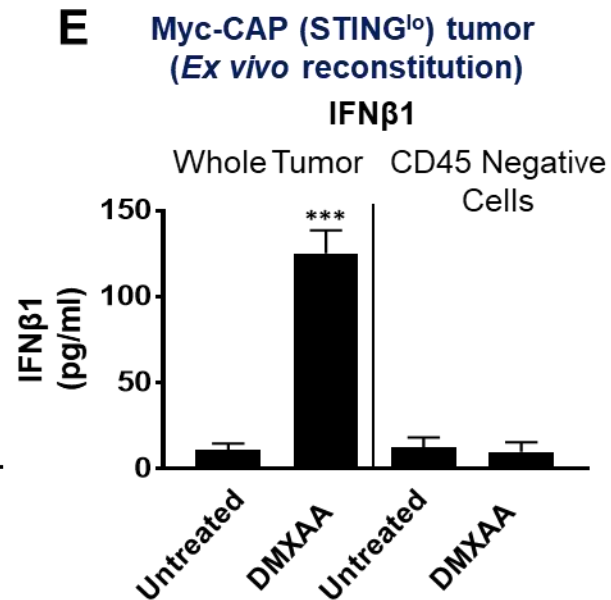**Supplementary Figure 1**

**A****p- $\gamma$ H2AX foci**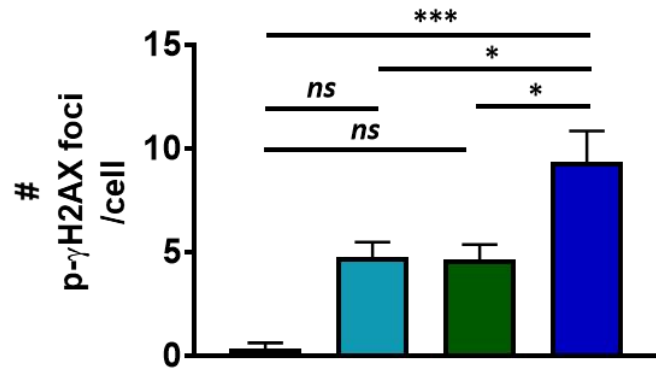**B****Drug Dose Response**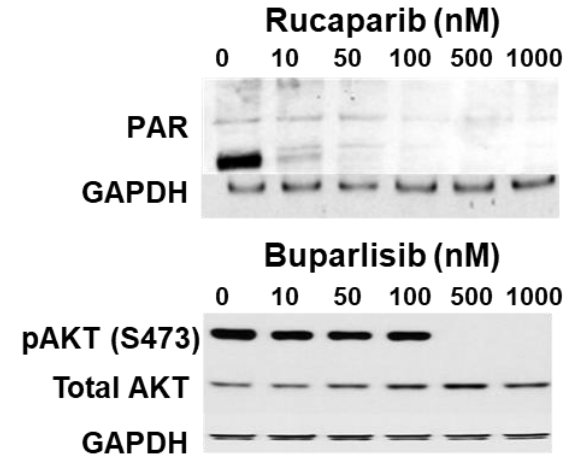**C****Viability**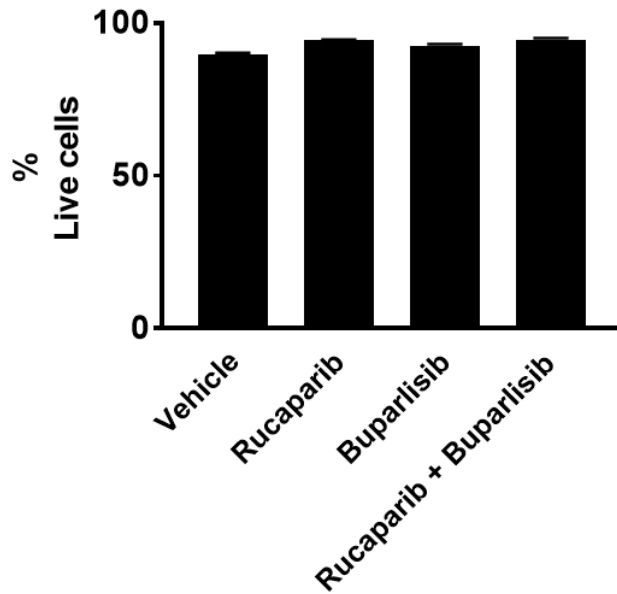**D****MV-associated DNA DSBs**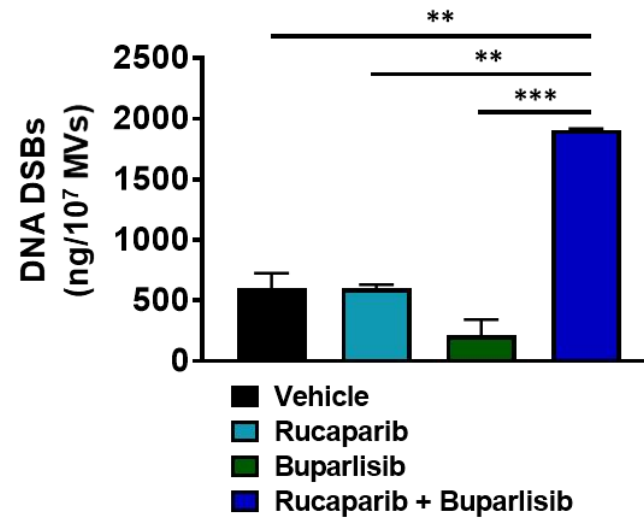

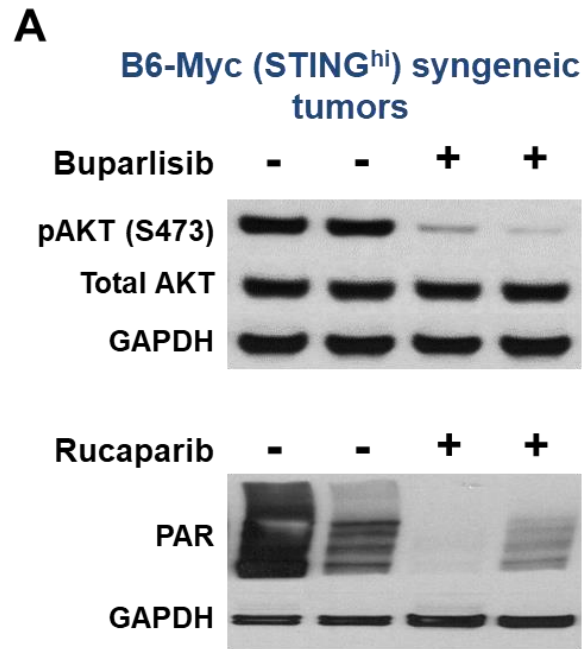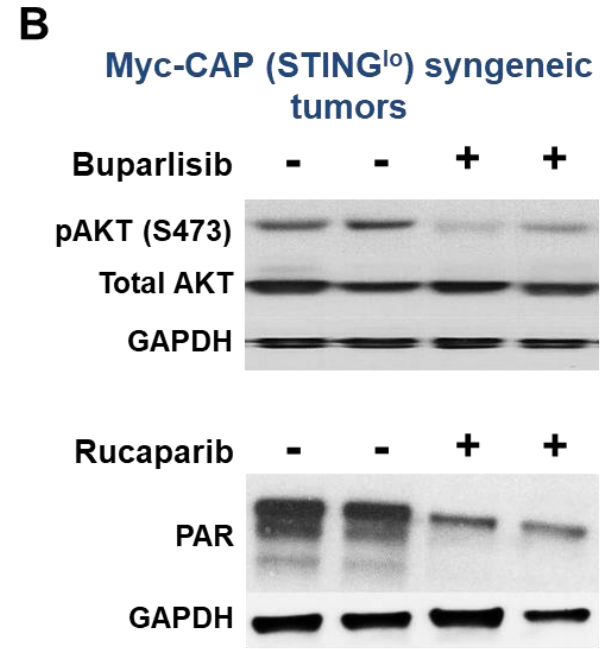

## B6-Myc (STING<sup>hi</sup>) – Immunodeficient (Athymic Nude)

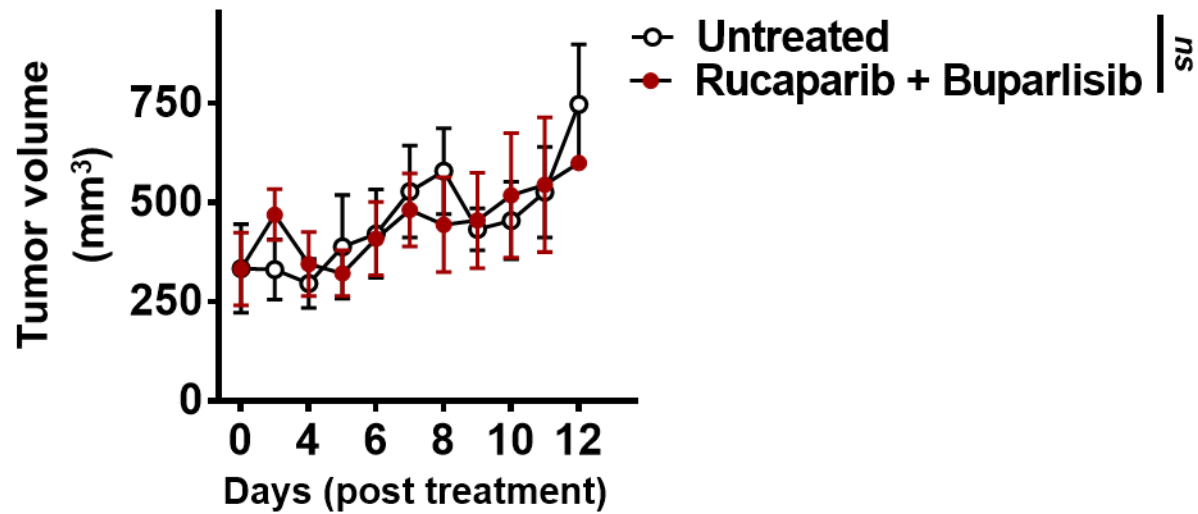

## B6-Myc (STING<sup>hi</sup>)

% DC Activation

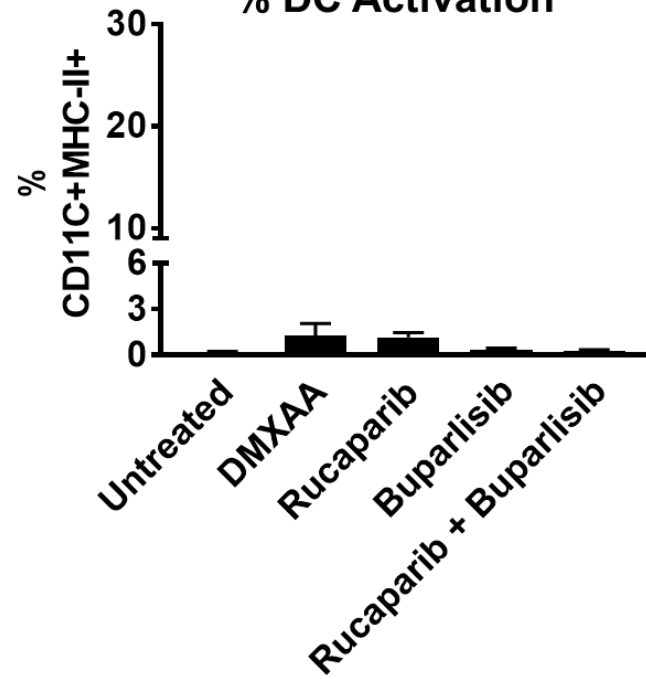

**A**

**CD4 T cell Infiltration**

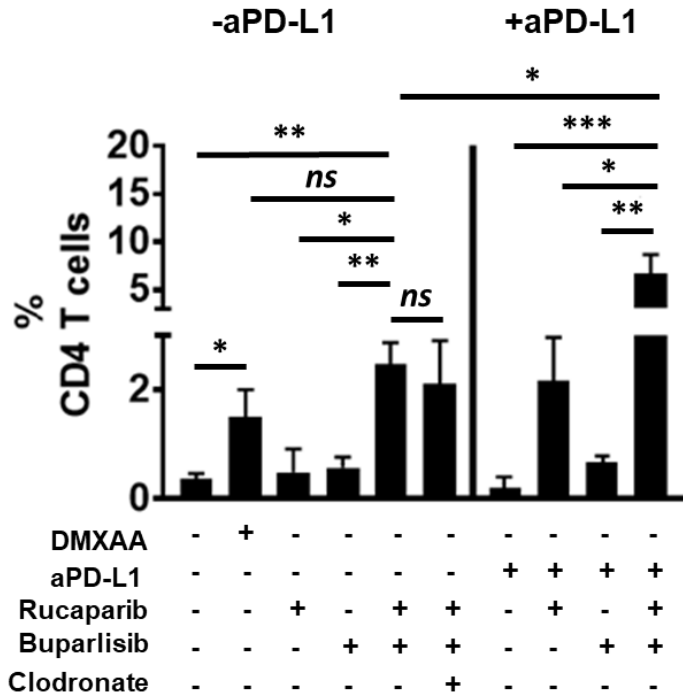

**B**

**CD4 T cell Activation**

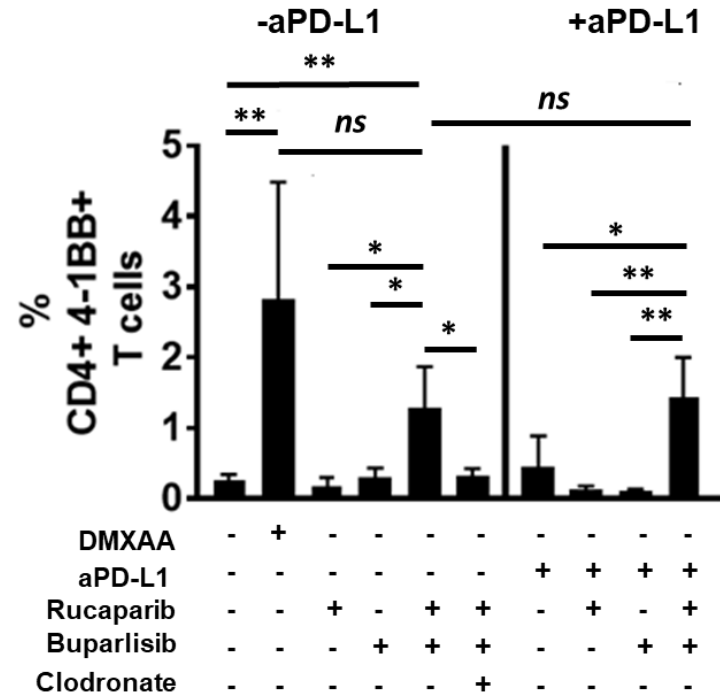



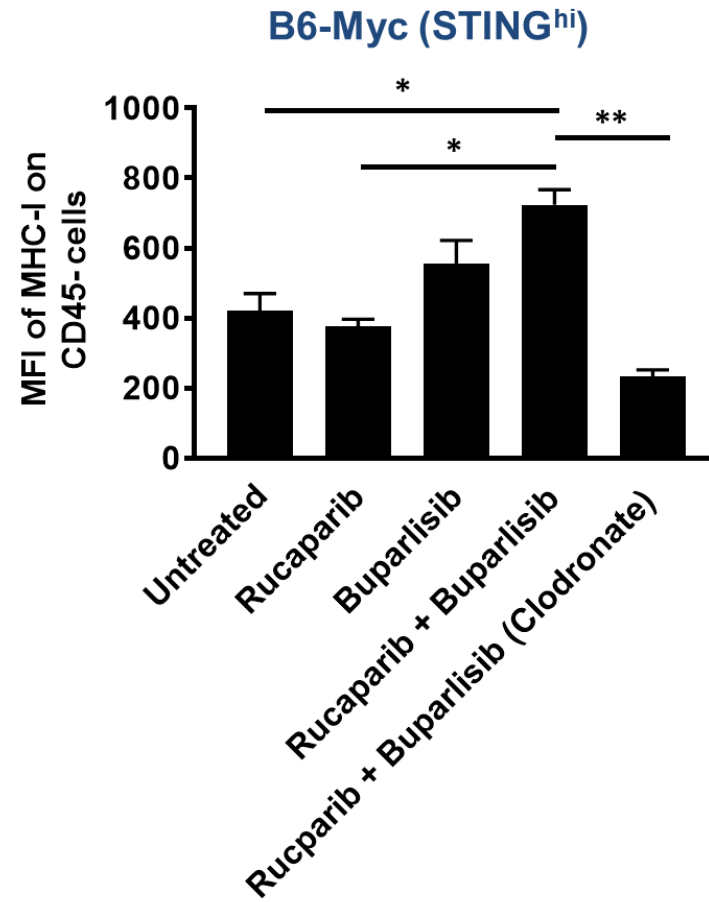

**A**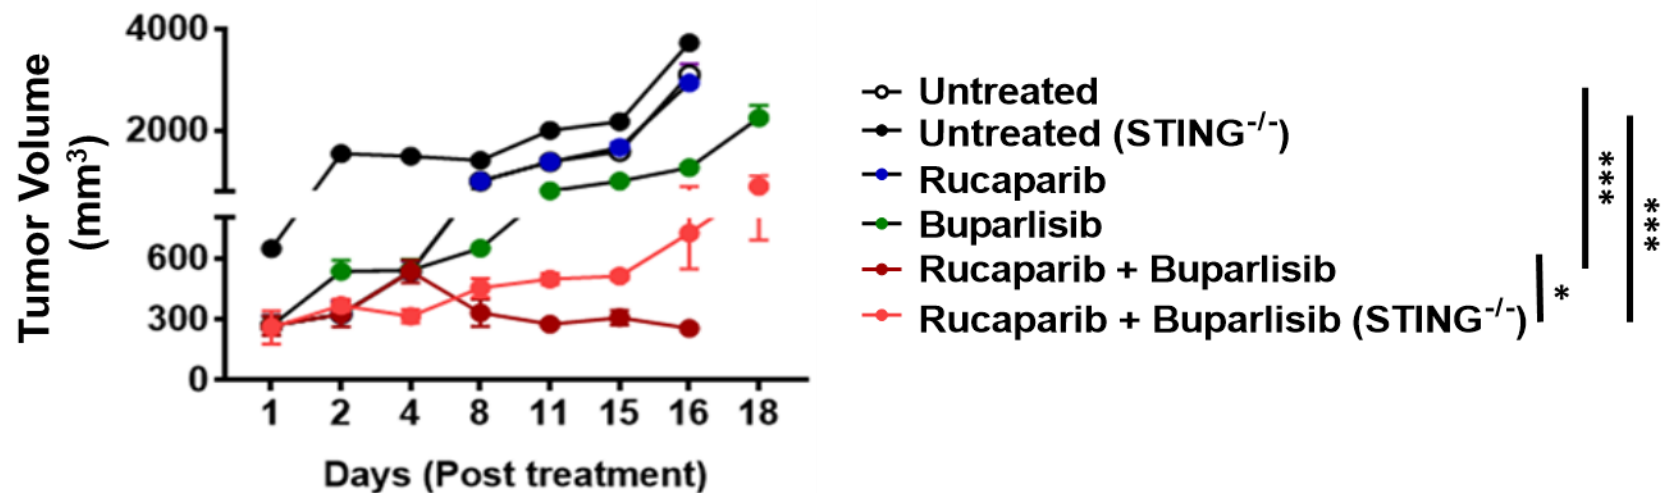**B**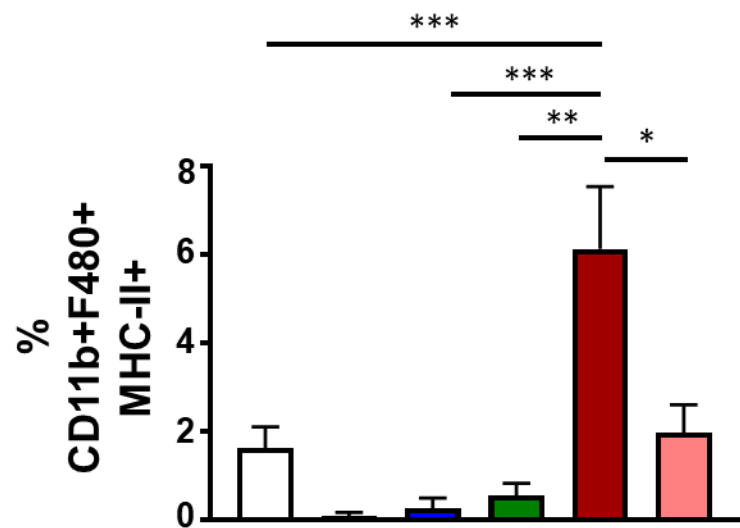**C**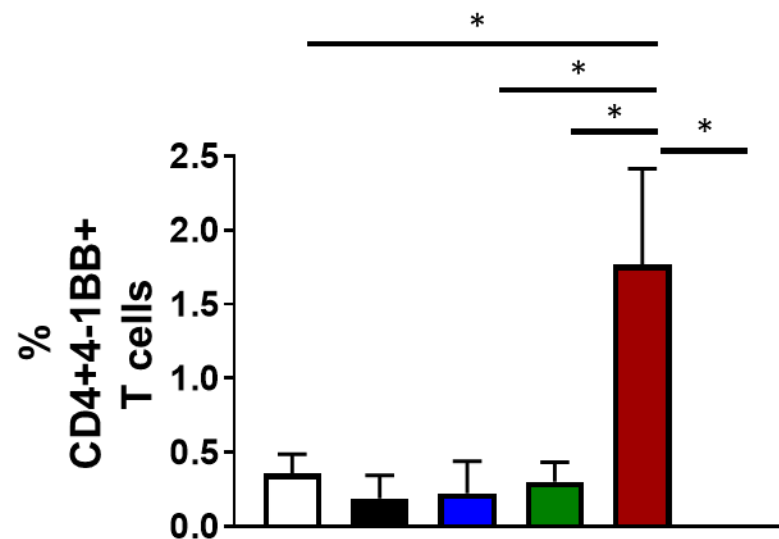

### Myc-CAP (STING<sup>lo</sup>) - Uncastrated

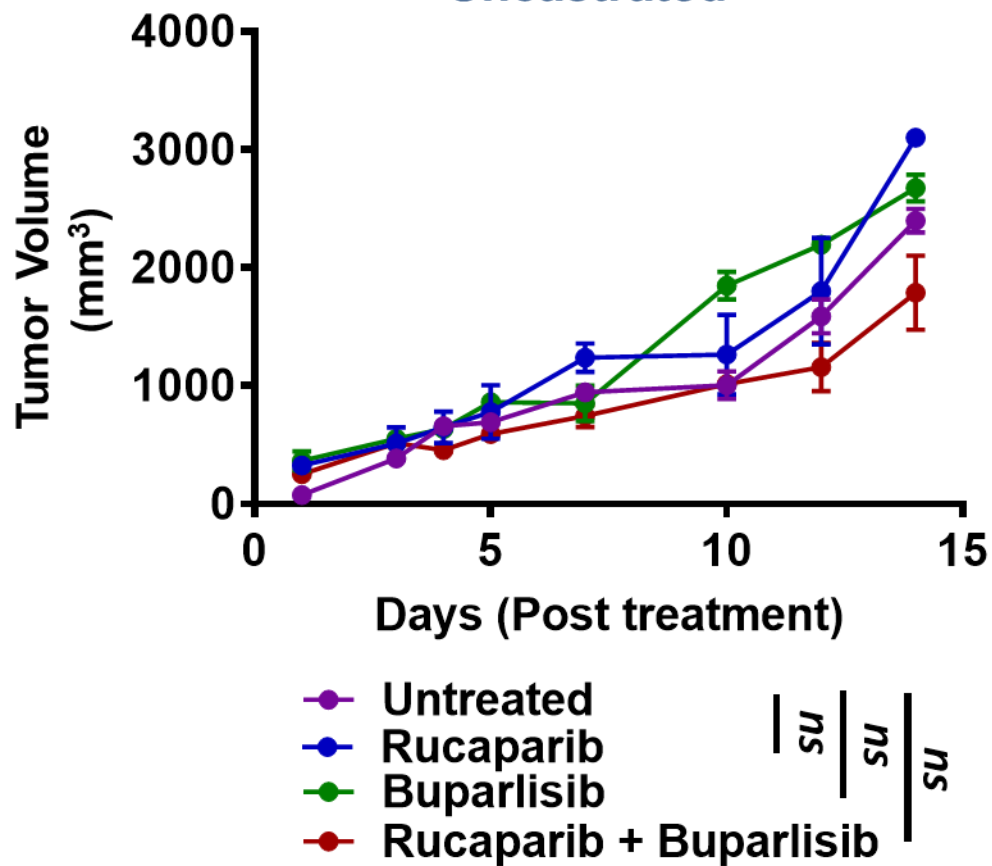

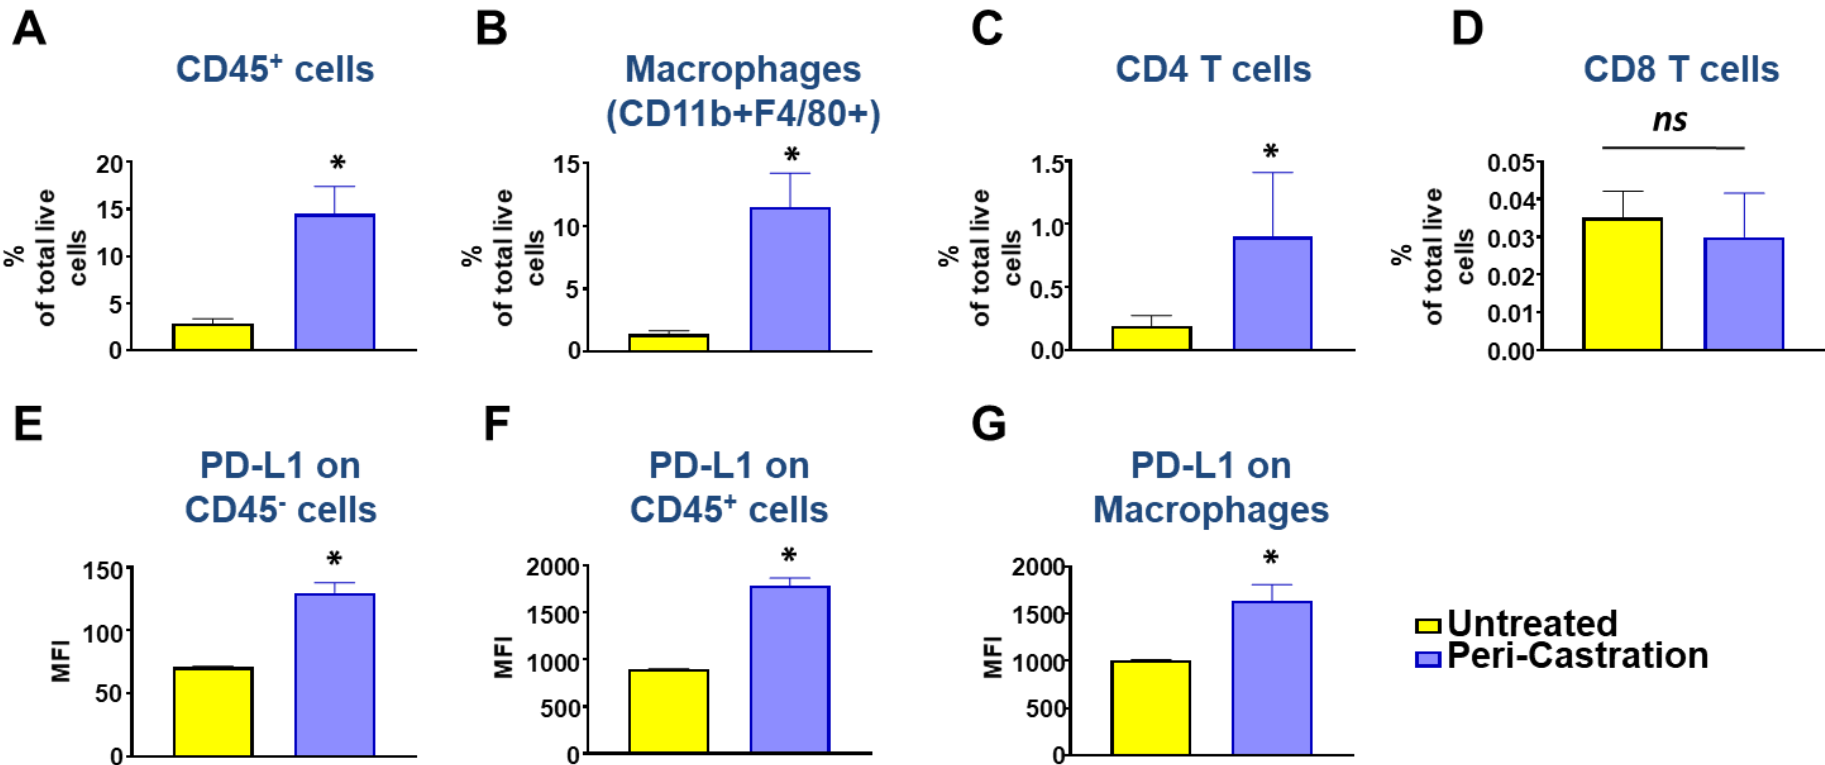

Supplementary Figure 10

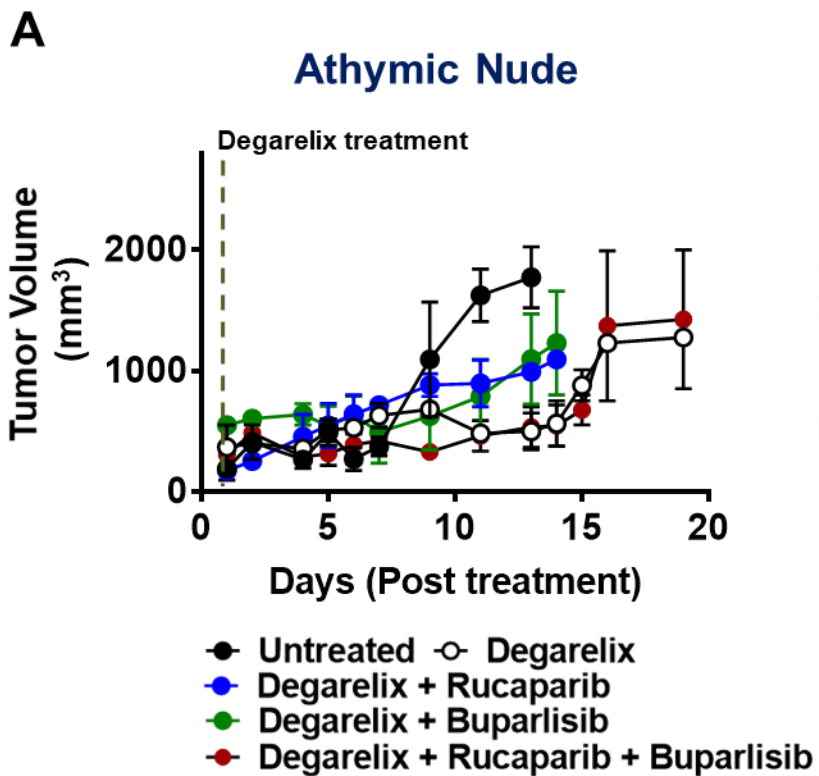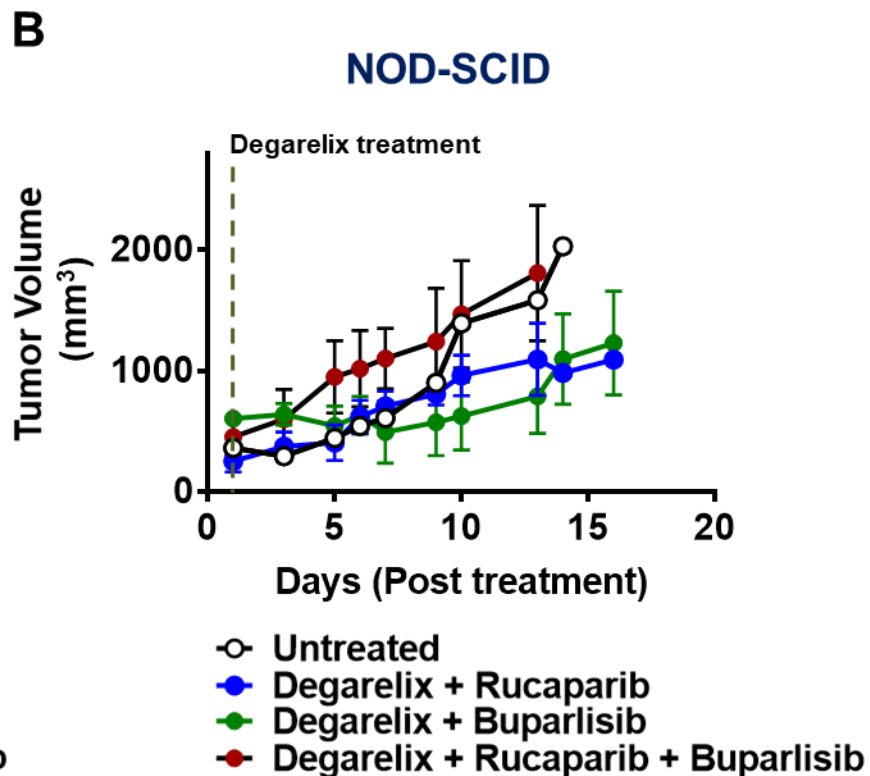

**A**

**CD4 T cell Infiltration**

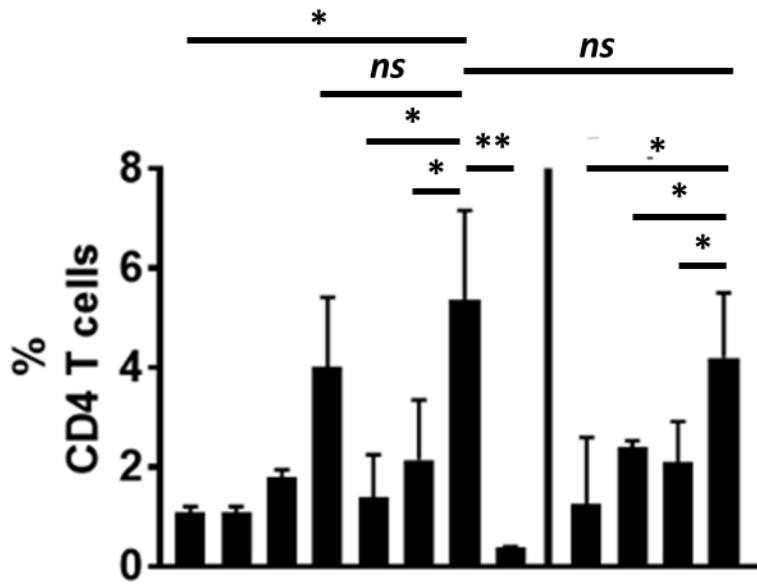

|            |   |   |   |   |   |   |   |   |   |   |   |   |
|------------|---|---|---|---|---|---|---|---|---|---|---|---|
| Degarelix  | - | + | - | + | + | + | + | + | + | + | + | + |
| DMXAA      | - | - | + | + | - | - | - | - | - | - | - | - |
| aPD-L1     | - | - | - | - | - | - | - | - | + | + | + | + |
| Rucaparib  | - | - | - | - | + | - | + | + | - | + | - | + |
| Buparlisib | - | - | - | - | - | + | + | + | - | - | + | + |
| Clodronate | - | - | - | - | - | - | - | + | - | - | - | - |

**B**

**CD4 T cell Activation**

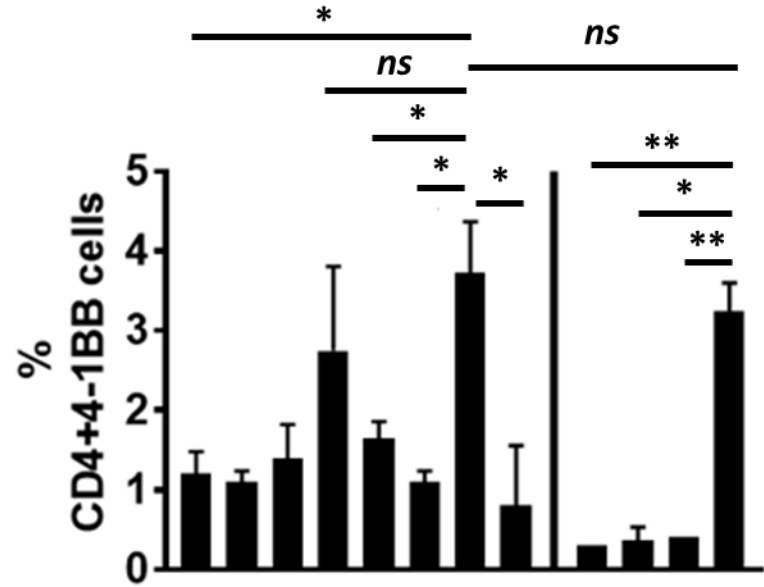

|            |   |   |   |   |   |   |   |   |   |   |   |   |
|------------|---|---|---|---|---|---|---|---|---|---|---|---|
| Degarelix  | - | + | - | + | + | + | + | + | + | + | + | + |
| DMXAA      | - | - | + | + | - | - | - | - | - | - | - | - |
| aPD-L1     | - | - | - | - | - | - | - | - | + | + | + | + |
| Rucaparib  | - | - | - | - | + | - | + | + | - | + | - | + |
| Buparlisib | - | - | - | - | - | + | + | + | - | - | + | + |
| Clodronate | - | - | - | - | - | - | - | + | - | - | - | - |

**A**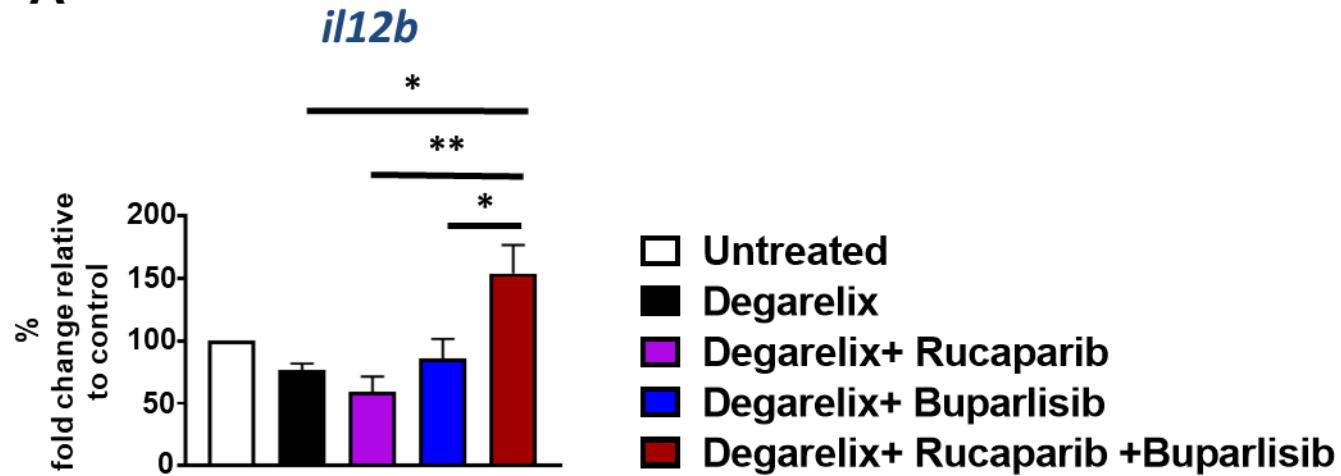**B**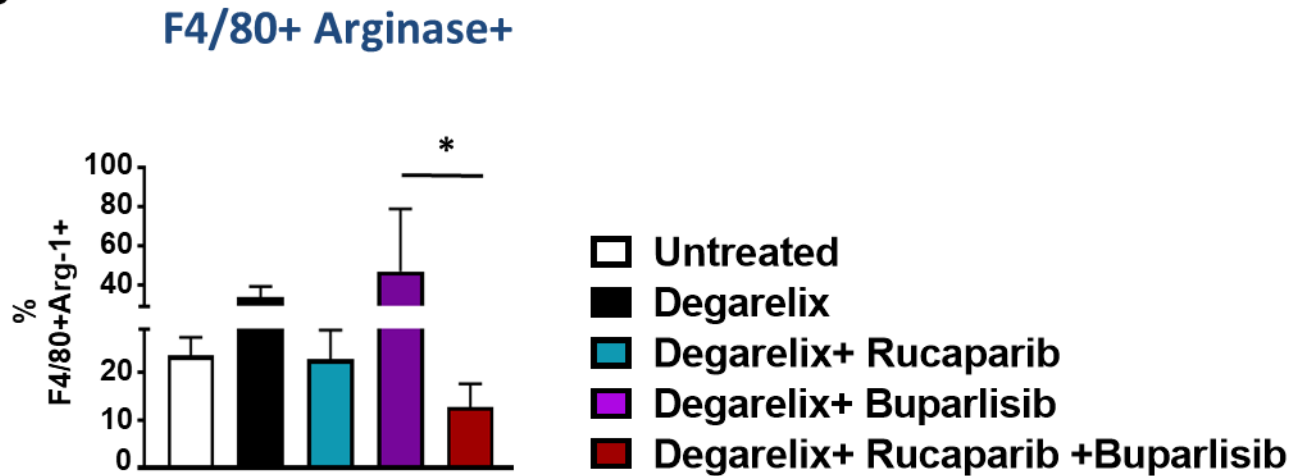

**A**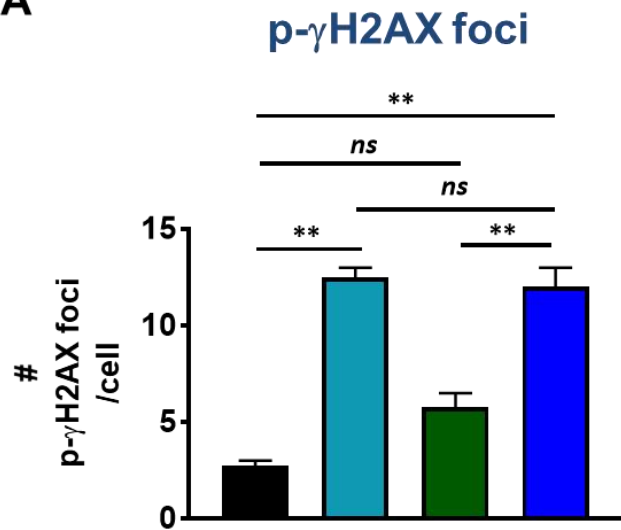**B**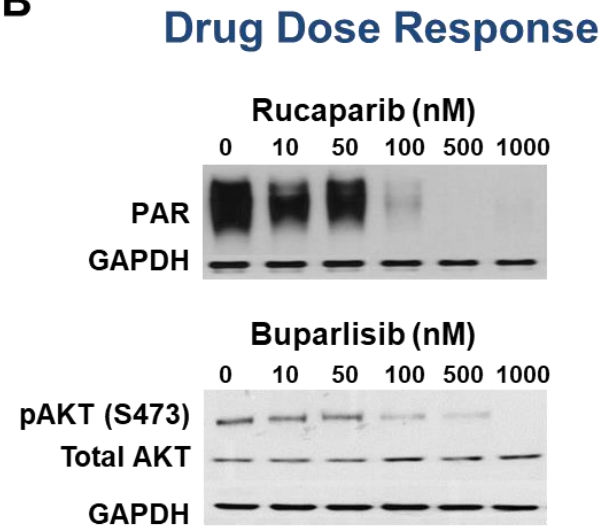**C**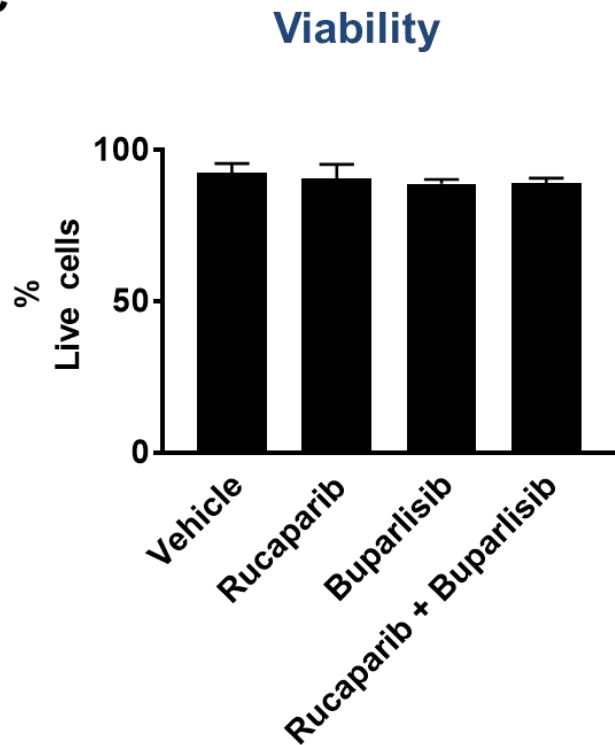**D**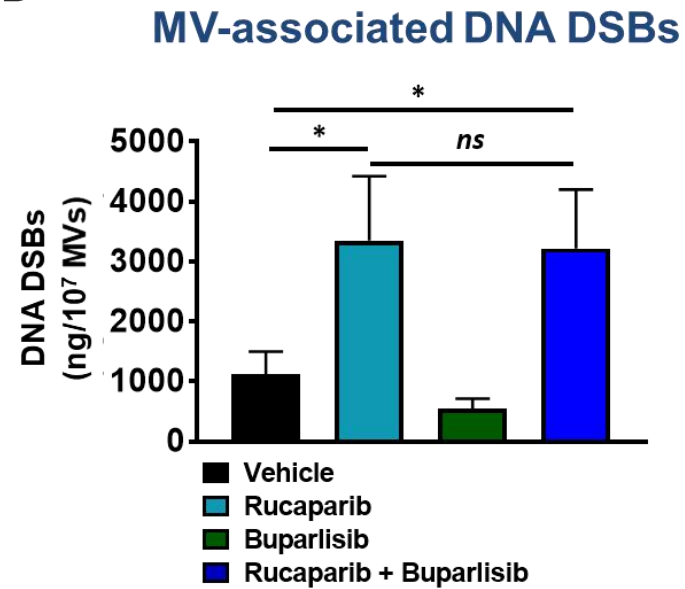



## BMDMs

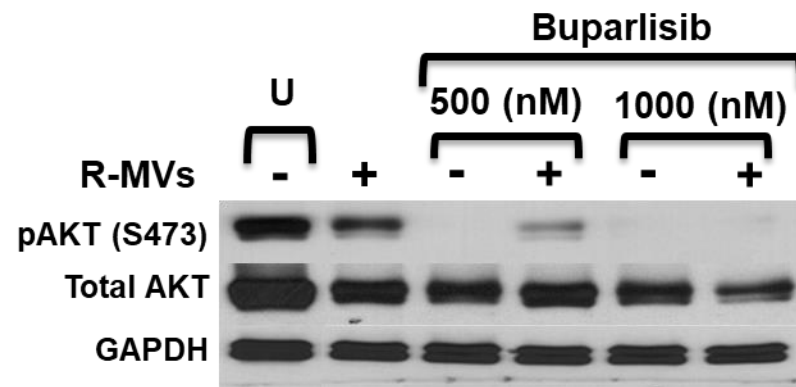

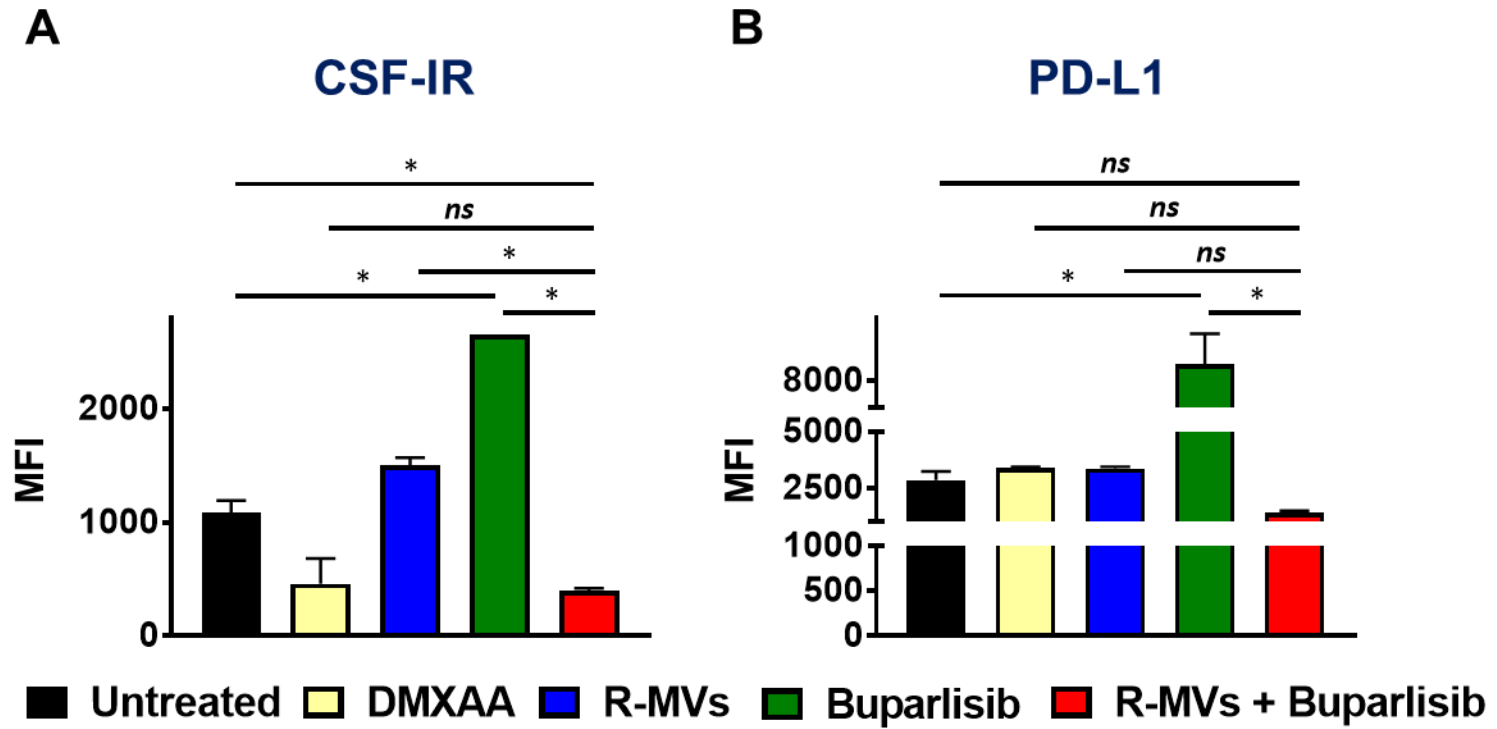

**A** MHC-II + Macrophages

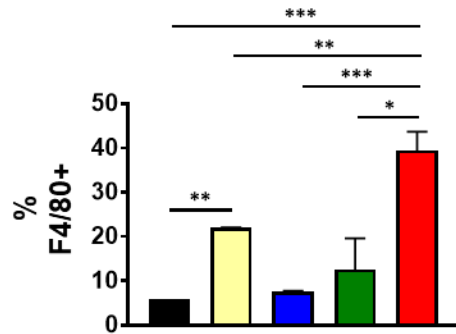

**B** iNOS + Macrophages

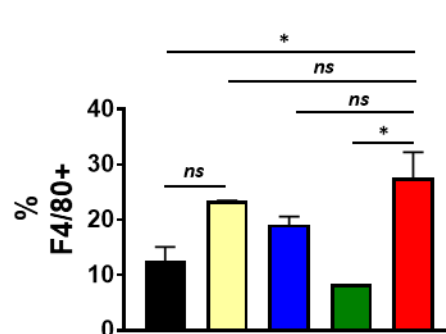

**C** Arginase+ Macrophages

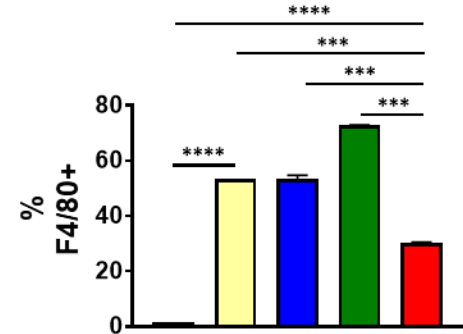

**D** CXCL10

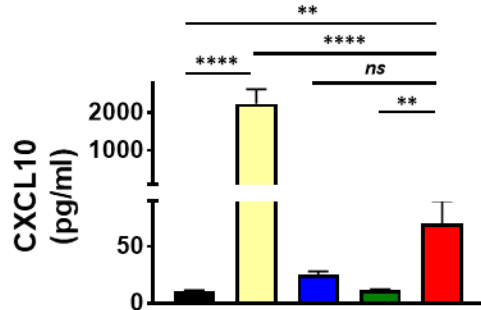

**E** CCL5

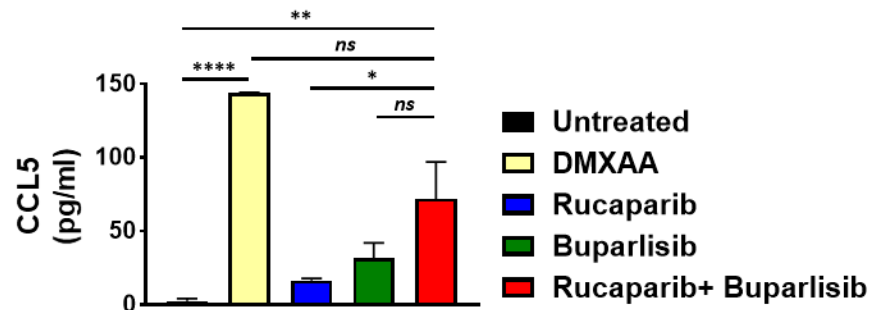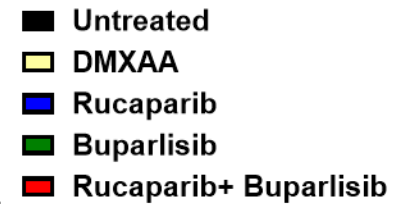

| mCRPC patients                  | Gating strategy                                                  | Average (%) ± SD (%) |
|---------------------------------|------------------------------------------------------------------|----------------------|
| Immune cells                    | Live+ CD45+                                                      | 13 ± 1.43            |
| Non -Immune cells               | Live+ CD45-                                                      | 87 ± 1.4             |
| Lymphoid                        | Live+ CD45+ CD3/CD45+ CD19+                                      | 22 ± 12              |
| Myeloid                         | Live+ CD45+ CD11b+ CD3- CD19-                                    | 78 ± 8               |
| T cells                         | Live+ CD45+ CD3+                                                 | 22 ± 12              |
| B cells                         | Live+ CD45+ CD3- CD19+                                           | 0 ± 0                |
| DCs                             | Live+ CD45+ CD11b+ CD11c+                                        | 6.4 ± 12             |
| Gr-MDSC                         | Live+ CD45+ CD11b+ HLA-DR- CD15 <sup>hi</sup> CD33 <sup>lo</sup> | 11.2 ± 3.7           |
| Mo-MDSC                         | Live+ CD45+ CD11b+ HLA-DR- CD15 <sup>lo</sup> CD33 <sup>hi</sup> | 13.6 ± 7.2           |
| Macrophage                      | Live+ CD45+ CD11b+ CD163+ CD68+                                  | 46.8 ± 9.4           |
| Activated Macrophages           | Live+ CD45+ CD11b+ CD163+ CD68+ HLA-DR+                          | 20.6 ± 10.6          |
| Un-activated Macrophages        | Live+ CD45+ CD11b+ CD163+ CD68+ HLA-DR-                          | 79.4 ± 12.9          |
| Myc-CAP (STING <sup>lo</sup> )  | Gating strategy                                                  | Average (%) ± SD (%) |
| Immune cells                    | Live+ CD45+                                                      | 2.6 ± 0.9            |
| Non -Immune cells               | Live+ CD45-                                                      | 97.4 ± 0.9           |
| Lymphoid                        | Live+ CD45+ CD3+ /CD45+ CD19+                                    | 22 ± 4               |
| Myeloid                         | Live+ CD45+ CD11b+ CD3- CD19-                                    | 78 ± 4               |
| T cells                         | Live+ CD45+ TCRb+                                                | 20 ± 8               |
| B cells                         | Live+ CD45+ TCRb- CD19+                                          | 1.6 ± 0.9            |
| DCs                             | Live+ CD45+ CD11b+ CD11c+                                        | 2.2 ± 1.5            |
| Gr-MDSC                         | Live+ CD45+ CD11b+ MHC-II- Ly6G <sup>hi</sup> Ly6C <sup>lo</sup> | 0 ± 0                |
| Mo-MDSC                         | Live+ CD45+ CD11b+ MHC-II- Ly6G <sup>lo</sup> Ly6C <sup>hi</sup> | 33 ± 6.1             |
| Macrophage                      | Live+ CD45+ CD11b+ F480+                                         | 43.2 ± 7.2           |
| Activation state of Macrophages | Live+ CD45+ CD11b+ F480+ MHC-II+                                 | 35 ± 3               |
| Un-activated Macrophages        | Live+ CD45+ CD11b+ F480+ MHC-II-                                 | 65 ± 3               |
| B6-Myc (STING <sup>hi</sup> )   | Gating strategy                                                  | Average (%) ± SD (%) |
| Immune cells                    | Live+ CD45+                                                      | 26 ± 5.8             |
| Non -Immune cells               | Live+ CD45-                                                      | 74 ± 5.8             |
| Lymphoid                        | Live+ CD45+ CD3+ /CD45+ CD19+                                    | 15.9 ± 2             |
| Myeloid                         | Live+ CD45+ CD11b+ CD3- CD19-                                    | 84.1 ± 2.9           |
| T cells                         | Live+ CD45+ TCRb+                                                | 5.2 ± 2              |
| B cells                         | Live+ CD45+ TCRb- CD19+                                          | 10.2 ± 2             |
| DCs                             | Live+ CD45+ CD11b+ CD11c+                                        | 13.6 ± 3.5           |
| Gr-MDSC                         | Live+ CD45+ CD11b+ MHC-II- Ly6G <sup>hi</sup> Ly6C <sup>lo</sup> | 29.2 ± 4             |
| Mo-MDSC                         | Live+ CD45+ CD11b+ MHC-II- Ly6G <sup>lo</sup> Ly6C <sup>hi</sup> | 2.8 ± 1.1            |
| Macrophage                      | Live+ CD45+ CD11b+ F480+                                         | 39 ± 3               |
| Activation state of Macrophages | Live+ CD45+ CD11b+ F480+ MHC-II+                                 | 30.3 ± 3             |
| Un-activated Macrophages        | Live+ CD45+ CD11b+ F480+ MHC-II-                                 | 69.7 ± 3             |

Supplementary Table 1
